# Supplementary material for: Longitudinal panel data study of self-rated health among migrants in French-speaking Switzerland, 2003–2017
Source: PubMed Central journal article supplement — BMJ Open. 2020 Aug 13;10(8):e035812. doi: 10.1136/bmjopen-2019-035812 (PMC7430401; doi:10.1136/bmjopen-2019-035812), 2020-08-13
Supplement: bmjopen-2019-035812.draft_revisions.pdf [file bmjopen-2019-035812.draft_revisions.pdf]

# BMJ Open

BMJ Open is committed to open peer review. As part of this commitment we make the peer review history of every article we publish publicly available.

When an article is published we post the peer reviewers' comments and the authors' responses online. We also post the versions of the paper that were used during peer review. These are the versions that the peer review comments apply to.

The versions of the paper that follow are the versions that were submitted during the peer review process. They are not the versions of record or the final published versions. They should not be cited or distributed as the published version of this manuscript.

BMJ Open is an open access journal and the full, final, typeset and author-corrected version of record of the manuscript is available on our site with no access controls, subscription charges or pay-per-view fees (<http://bmjopen.bmj.com>).

If you have any questions on BMJ Open's open peer review process please email [info.bmjopen@bmj.com](mailto:info.bmjopen@bmj.com)

# BMJ Open

## Longitudinal Study of Self-Rated health among Migrants of the CoLaus study in French-speaking Switzerland, 2003-2017.

|                               |                                                                                                                                                                                                                                                                                                                                                                                                                                                                                                                                                                                                                |
|-------------------------------|----------------------------------------------------------------------------------------------------------------------------------------------------------------------------------------------------------------------------------------------------------------------------------------------------------------------------------------------------------------------------------------------------------------------------------------------------------------------------------------------------------------------------------------------------------------------------------------------------------------|
| Journal:                      | <i>BMJ Open</i>                                                                                                                                                                                                                                                                                                                                                                                                                                                                                                                                                                                                |
| Manuscript ID                 | bmjopen-2019-035812                                                                                                                                                                                                                                                                                                                                                                                                                                                                                                                                                                                            |
| Article Type:                 | Original research                                                                                                                                                                                                                                                                                                                                                                                                                                                                                                                                                                                              |
| Date Submitted by the Author: | 25-Nov-2019                                                                                                                                                                                                                                                                                                                                                                                                                                                                                                                                                                                                    |
| Complete List of Authors:     | Mota, Pau; University Center for General Medicine and Public Health, Department of Vulnerabilities and Social Medicine<br>Saez, Marc; Universitat de Girona, Research Group on Statistics, Econometrics and Health (GRECS); CIBER of Epidemiology and Public Health (CIBERESP),<br>Selby, Kevin; University Center for General Medicine and Public Health, Department the Policlinics<br>Bodenmann, Patrick; University Center for General Medicine and Public Health, Department of Vulnerabilities and Social Medicine; University Center for General Medicine and Public Health, Department the Policlinics |
| Keywords:                     | SOCIAL MEDICINE, STATISTICS & RESEARCH METHODS, PUBLIC HEALTH                                                                                                                                                                                                                                                                                                                                                                                                                                                                                                                                                  |
|                               |                                                                                                                                                                                                                                                                                                                                                                                                                                                                                                                                                                                                                |

SCHOLARONE™  
Manuscripts

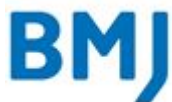

I, the Submitting Author has the right to grant and does grant on behalf of all authors of the Work (as defined in the below author licence), an exclusive licence and/or a non-exclusive licence for contributions from authors who are: i) UK Crown employees; ii) where BMJ has agreed a CC-BY licence shall apply, and/or iii) in accordance with the terms applicable for US Federal Government officers or employees acting as part of their official duties; on a worldwide, perpetual, irrevocable, royalty-free basis to BMJ Publishing Group Ltd ("BMJ") its licensees and where the relevant Journal is co-owned by BMJ to the co-owners of the Journal, to publish the Work in this journal and any other BMJ products and to exploit all rights, as set out in our [licence](#).

The Submitting Author accepts and understands that any supply made under these terms is made by BMJ to the Submitting Author unless you are acting as an employee on behalf of your employer or a postgraduate student of an affiliated institution which is paying any applicable article publishing charge ("APC") for Open Access articles. Where the Submitting Author wishes to make the Work available on an Open Access basis (and intends to pay the relevant APC), the terms of reuse of such Open Access shall be governed by a Creative Commons licence – details of these licences and which [Creative Commons](#) licence will apply to this Work are set out in our licence referred to above.

Other than as permitted in any relevant BMJ Author's Self Archiving Policies, I confirm this Work has not been accepted for publication elsewhere, is not being considered for publication elsewhere and does not duplicate material already published. I confirm all authors consent to publication of this Work and authorise the granting of this licence.

1  
2  
3 **1 Longitudinal Study of Self-Rated health among Migrants**  
4  
5 **2 of the CoLaus study in French-speaking Switzerland, 2003-2017.**  
6

7 **3 Mota P<sup>1\*</sup>, Saez M<sup>2,3</sup>, Selby K<sup>4</sup>, Bodenmann P.<sup>1,4</sup>**  
8  
9

10 **4**  
11 **5 \* corresponding author:**  
12 **6**

13 **7 Department of Vulnerabilities and Social Medicine,**  
14 **8 University Center for General Medicine and Public Health**  
15 **9 44, Rue du Bugnon. CH – 1011 Lausanne, Switzerland**  
16 **10 Phone: +41787708423**  
17 **11 Email: paumotamoya@gmail.com**  
18 **12**

19  
20  
21 **13 1. Department of Vulnerabilities and Social Medicine, University Center for General Medicine**  
22 **14 and Public Health, Lausanne, Switzerland.**  
23 **15**

24 **16 2. Research Group on Statistics, Econometrics and Health (GRECS), University of**  
25 **17 Girona, Girona, Spain.**

26 **18 3. CIBER of Epidemiology and Public Health (CIBERESP), Madrid, Spain**

27  
28 **19 4. Department the Polyclinics, University Center for General Medicine and Public Health,**  
29 **20 Lausanne, Switzerland.**  
30  
31  
32

33 **21**  
34  
35 **22**  
36  
37 **23 Email addresses:**  
38

39 **24 Mota P: paumotamoya@gmail.com**  
40

41 **25 Saez M: marc.saez@udg.edu**  
42

43 **26 Selby K: kevin.selby@hospvd.ch**  
44

45 **27 Bodenmann P: patrick.bodenmann@hospvd.ch**  
46  
47  
48 **28**  
49  
50  
51  
52  
53  
54  
55  
56  
57

## ABSTRACT

**Introduction:** Studies have documented poorer health among migrants than natives of several European countries, but little is known for Switzerland. **Aim:** To assess the association between self-reported health, country of birth, socio-economic factors and poor health in a prospective cohort of adults living in Lausanne, Switzerland. **Design:** We used the data from the Colaus prospective study for three periods: 2003-6 (n=6733), 2009-12 (n=5064) and 2014-17 (n=4555). The response variable was self-reported health (SRH). Main explanatory variables were socioeconomic status, educational level, professional status, income, gender, age and years in Switzerland. The main covariate was country of birth, dichotomized as born in Switzerland or not. **Method:** we specified random effects logistic regressions and used Bayesian methods for the inference. **Results:** Being born outside of Switzerland was not associated with worse SRH (OR 1.09 (95%CI 0.52-2.31)). Several other patient variables were, however, predictive of poor health. Educational level was inversely associated with the risk of reporting poor health. Monthly household income showed a gradient where higher income was associated with lower odds of reporting poor SRH, for both for migrants and non-migrants. Migrant women had lower odds of reporting poor SRH than men (OR=0.73, CI=0.55-0.98). Migrant people living in couple have less risk of reporting poor SRH than people who live alone and the risk is lower for migrant people living in couple with children (OR=0.66, 95% CI=0.55-0.80). **Conclusions:** Migrant status was not associated with poorer SRH. However, differences in SRH were observed based on gender, age and several social determinants of health.

### Keywords

Migration, self-rated health, social determinants of health, longitudinal study.

1  
2  
3 53 **Article Summary**  
4

5 54 **Strengths and limitations of this study**  
6

- 7
- 8 55 • First cohort study where we compare SRH between migrants and non-migrants populations  
9 in Switzerland.  
10 56
  - 11 57 • The strengths of this study are the size of the sample and the rigorous collection of data.  
12
  - 13 58 • Another strengths are the advanced statistical approaches that made it possible to control  
14 both measured and unmeasured confounding factors.  
15 59
  - 16 60 • Among the weaknesses, the predominant migration groups included in this study may be  
17 more similar to those born in Switzerland than more recent migrant groups particularly.  
18 61
  - 19 62 • The complex modelling used in this study generates large confidence intervals makes it  
20 more difficult to exclude a small influence of the country of birth.  
21 63  
22  
23  
24  
25  
26  
27  
28  
29  
30  
31  
32  
33

34 66 **Word count: 2373**  
35  
36  
37  
38  
39  
40  
41  
42  
43  
44  
45  
46  
47  
48  
49  
50  
51  
52  
53  
54  
55  
56  
57  
58  
59  
60

## 68 **Introduction**

69 Differences in Self-Rated Health (SRH) between migrants and natives have been documented in  
70 several European countries but not yet in Switzerland (1–4). SRH is a well-established indicator  
71 used in epidemiology and public health research and has been fully documented to be an  
72 independent predictor of health outcomes such as morbidity and mortality (5–9). Numerous studies  
73 in European countries have reported that in regard to SRH, most migrant and ethnic minority groups  
74 studied appear, on average, to have lower health status compared with the majority population  
75 (6,7,10,11). Moreover, SRH appears to be associated with the patient's mental health (12–16).

76  
77 However, it is also possible that differences in health status are attributable to migrants being of  
78 lower socio-economic status than non-migrants populations within a same society and this is a key  
79 factor to be taken into account in a comparative analysis of SRH (19). The scientific evidence of  
80 the social determinants of health (SDH) is well-known (17–19). Socioeconomic status is linked to  
81 overall health status not simply through the direct physical effects of exposure to better or worse  
82 material conditions, it is also a matter of position in the social hierarchy (17,18). The migratory  
83 process often leads to a period of vulnerability to arrival in the host country as well as a sharp change  
84 in the socio-economic status that have an impact on health condition.. Some authors even consider  
85 the migratory process as a SDH (20).

86  
87 Our main objective was to investigate differences in SRH of migrants compared to non-migrants in  
88 a representative cohort of Swiss adults followed for 10+ years. We focus on migrants as people born  
89 outside Switzerland and we analysed differences on country of birth and years living in the country.

1  
2  
3 90 We focus on SDH and the specific characteristics of migrant Cohort patients compared to  
4  
5 91 individuals who have not experienced a migration process (21–26).  
6  
7  
8 92  
9

### 10 11 93 **Method**

12  
13 94 We used data from the Colaus cohort in Lausanne, Switzerland, and from the PsyCoLaus study, a  
14  
15 95 subsample from the larger CoLaus study focus on mental health. The CoLaus cohort is a population-  
16  
17 96 based study designed to assess the prevalence and determinants of cardiovascular risk factors and  
18  
19 97 diseases in Lausanne, a city of 145,000 inhabitants of whom 62,000 (43%) were born outside of  
20  
21 98 Switzerland. Its aims and sampling strategy have been reported previously (27).  
22  
23

24  
25 99 The source population was defined as all subjects aged between 35 and 75 years registered in the  
26  
27 100 population register of the city. A simple, non-stratified random sample of 19,830 subjects  
28  
29 101 (corresponding to 35% of the source population) was drawn and the selected subjects were invited  
30  
31 102 to participate. The inclusion criteria were to sign the written informed consent and the willingness  
32  
33 103 to take part in the examination.  
34  
35

36 104  
37  
38 105 Recruitment was performed between 2003 and 2006 and included 6733 participants. The first  
39  
40 106 follow-up visit was conducted between April 2009 and September 2012 and included 5064  
41  
42 107 participants; the second follow-up was conducted between May 2014 and April 2017 and included  
43  
44 108 4555 participants. The first and second follow-ups included all participants willing to be re-  
45  
46 109 contacted. For this study, data from baseline study and both follow-up examinations was used.  
47  
48  
49

50 110  
51  
52 111 The response variable is SRH from self reported Likert scale that we transformed into a dichotomic  
53  
54 112 variable. The following categories: very good and good transformed as a single variable -good  
55  
56  
57



1  
2  
3 113 health- and categories fair, bad and very bad transformed as a single variable -poor health-. We also  
4  
5 114 considered the mental health as a dependent or response variable through 3 main different indicators  
6  
7  
8 115 (each categorized as present or absent (1 or 0 respectively): Anxiety disorders (General anxiety,  
9  
10 116 trouble panic, social phobia, agoraphobia, other), Depressive disorders (atypical depressive  
11  
12 117 disorder, depressive disorder, other) and the Post-Traumatic Stress Disorder (PTSD). The remaining  
13  
14  
15 118 participants born in other countries were grouped in a single category (n=1191).

16  
17 119  
18  
19 120 The main explanatory variables are being born outside Switzerland, the country of birth and the  
20  
21 121 years living in Switzerland. We include interactions between being born abroad and the years living  
22  
23 122 in Switzerland with all explanatory variables. The control variables were gender, age, the Socio  
24  
25 123 Economic Status (SES) following the Hollingshead scale, the educational level, job type, current  
26  
27 124 professional status, monthly household gross income and alcohol consumption.

28  
29  
30  
31 125  
32  
33 126 We compared individuals by using Student's t-test and the Mann-Whitney U test for quantitative  
34  
35 127 variables and Pearson's chi-square for qualitative variables. For the multivariable analysis, we used  
36  
37 128 a Generalized Linear Mixed Model (GLMM) with binomial response and a logistic link,

39  
40 129

41  
42 130  
43  
44 131 
$$\log \left( \frac{\text{Pr ob}(Y_{it} = 1)}{1 - \text{Pr ob}(Y_{it} = 1)} \right) = \eta_{it}$$

45  
46  
47 132  
48  
49 133 where  $Y$  corresponds to the response variable,  $i$  the individual studied,  $t$  the year of the follow-up,  
50  
51 134 and  $\eta_{it}$  a linear predictor for the subject  $i$  and the year of follow-up  $t$ . We included in the linear  
52  
53 135 predictor of each individual in the logistic model, the explanatory variables of interest that could

1  
2  
3 136 explain the probability of being a case (i.e. poor SRH, presence of an anxiety disorder, presence of  
4  
5 137 a depressive disorder or presence of a PTSD).  
6  
7

8 138  
9  
10 139 The interactions between the variables "country of birth" and "number of years of life lived in  
11  
12 140 Switzerland" and the rest of the variables was also tested. In addition, we checked for the  
13  
14 141 confounding factors observed (including all control variables) and those possibly not measured by  
15  
16 142 the available data. These have been highlighted by including several random effects in the linear  
17  
18 143 prediction. In particular, we checked the presence of heterogeneity of individuals (i.e. variables that  
19  
20 144 were not initially observed, did not change over time and were specific to each person). We also  
21  
22 145 accounted for possible temporal heterogeneity by including a random effect of order (28).  
23  
24  
25

26 146  
27  
28 147 The reduced number of cases (i.e. poor SRH, presence of an anxiety disorder, presence of depressive  
29  
30 148 disorder, and presence of PTSD) reduced the statistical power to demonstrate differences between  
31  
32 149 groups. To increase any the statistical power - not increasing the sample size - we increased the  
33  
34 150 level of significance (i.e. alpha), reducing the likelihood of making a Type II error while increasing  
35  
36 151 statistical power. Given the complexity of our model, we preferred to make the inferences using a  
37  
38 152 Bayesian conceptual framework. This model allowed as to incorporate several levels of uncertainty  
39  
40 153 in our reported credibility intervals, including model uncertainty, missing data and unobserved  
41  
42 154 confounding. In particular, we used the Integrated Nested Laplace Approach (INLA) in a pure  
43  
44 155 Bayesian conceptual framework (29).  
45  
46  
47

48  
49 156 Apart from the odds ratios (OR) and their credibility intervals at 95% (95% ICr), the probability of  
50  
51 157 the parameter estimator (the log(OR) as an absolute value being more than 1 (Prob) is also shown  
52  
53 158 (note that it is unilateral and so does not necessarily have to coincide with the ICr in all the cases).  
54  
55  
56  
57

1  
2  
3 159 Unlike the p-value in a usual environment, this probability allows us to make inferences about the  
4  
5 160 possible association.  
6

7  
8 161 All analyses were performed with the free software R (version3.5.1) through the INLA approach  
9  
10 162 (28–31).  
11

### 12 163 *Patient and Public Involvement*

13  
14 164 No patient involved in the study  
15  
16 165  
17  
18  
19

## 20 166 **Results**

21  
22 167 Table 1 shows descriptive statistics for all variables included. Our sample included mainly people  
23  
24 168 from Switzerland (n= 4031, 60%), France (n=447, 6.6%), Italy (n=409, 6.1%), Portugal (n=391,  
25  
26 169 5.8%), Spain (n=262, 3.9%), and 1191 from all other countries (18%) (See table 1, 2).  
27  
28  
29

30 170 In unadjusted analyses, people born outside Switzerland reported having worse SRH during the  
31  
32 171 second and third CoLaus waves ( $p < 0.001$  for both waves). Nevertheless, in models adjusting for  
33  
34 172 other participant characteristics, we did not find a statistically significant difference for SRH among  
35  
36 173 the migrant and non-migrant populations. This result implies that other factors might explain  
37  
38 174 observed differences in SRH.  
39  
40  
41

42 175 Older age groups were more likely to report poor health than younger age groups, with stronger  
43  
44 176 associations among those from certain countries. All individuals aged 55 to 64 years had 44%  
45  
46 177 greater odds (OR = 1.44, 95% Credibility interval, CrI = 0.97-2.15) of reporting poor health than  
47  
48 178 younger populations. Interactions between country of birth and years of residence in Switzerland  
49  
50 179 showed that those born in France and living in Switzerland for 54 years had a 121% higher risk of  
51  
52 180 reporting poor health (OR = 2.21, CrI to 95% = 0.94-5.19) than those born in France and living in  
53  
54  
55  
56  
57  
58  
59  
60

1  
2  
3 181 Switzerland for 32 years. The same pattern was found among people born in Spain who have lived  
4  
5 182 in Switzerland for 54 years. They were 146% more likely to report health problems (OR = 2.46,  
6  
7 183 95% CrI = 0.87-6.98) than those born in Spain and living in Switzerland for less than 32 years.  
8  
9

10  
11 184 There was a gradient in health status by level of education. The higher the level of education, the  
12  
13 185 better the SRH among both migrant and non-migrant populations. Those with the level of an  
14  
15 186 apprenticeship had 33% less risk (OR = 0.66, 95% CrI = 0.49-0.90) of reporting poor health when  
16  
17 187 compared to those with compulsory education only. Those with a high school education were 37%  
18  
19 188 less likely and those with a higher education level 60% less likely to report poor health (OR = 0.40,  
20  
21 189 95% CrI 0.42) -0.92) than those with compulsory schooling. This is important since 33% of the  
22  
23 190 migrant population had only a compulsory education compared to 13% of the Swiss born.  
24  
25  
26

27  
28 191 The monthly household income also showed a gradient in health status. Households with a monthly  
29  
30 192 gross income between CHF 7,000 and CHF 9,499 were 32% less likely to report poor SRH than  
31  
32 193 households with incomes below CHF 3,000. Households with a monthly income greater than CHF  
33  
34 194 13'000 had a 45% lower risk of (OR = 0.55, 95% CrI = 0.28-1.06) describing a poor SRH. This  
35  
36 195 monthly income gradient was the same for migrant's households. We found significant different  
37  
38 196 effects for the current profession for both migrant and non-migrant populations. A Swiss born with  
39  
40 197 a liberal profession had a 62% lower risk of reporting poor SRH (OR = 0.38, 95% CrI = 0.16-0.91)  
41  
42 198 than a manual labourer; in contrast migrants with a liberal profession the risk of reporting poor  
43  
44 199 health was. Indeed, we found that migrants with a liberal profession (doctor or lawyer) had 152%  
45  
46 200 higher risk of describing a poor SRH (OR = 2.52, CrI to 95% = 0.91 to 6.96) than manual labourer.  
47  
48  
49  
50

51 201 For the group of people born in Switzerland, all categories of civil status had the same risk of  
52  
53 202 perceiving poor SRH as people living alone. However, childless migrant couples were 22% less  
54  
55  
56  
57

1  
2  
3 203 likely (OR = 0.78, 95% CrI = 0.67-0.92) to report poor SRH than those living alone and migrant  
4  
5 204 couples with children were 34% less likely (OR = 0.66, 95% CrI = 0.55-0.80) of perceived poor  
6  
7  
8 205 SRH than people living alone. The interaction between country of birth and couple with children  
9  
10 206 was also statistically significant, and a foreign-born couple with children was at 41% lower risk of  
11  
12 207 poor SRH health (OR = 0.59, 95% CrI = 0.40-0.87) than people living alone.  
13  
14

15 208 There was no association between the risk of having a psychiatric illness (major depressive disorder,  
16  
17 209 generalized anxiety disorder, panic disorder, social phobia, PTSD or agoraphobia) and belonging  
18  
19  
20 210 to the migrant group. Habitual alcohol consumers had 37% less risk of SRH (OR = 0.63, 95% CrI  
21  
22 211 = 0.51-0.78) than non-consumers (p = 0.999) and this pattern was the same for both groups.  
23  
24  
25  
26 212

## 27 28 213 **Discussion**

### 29 30 214 *Summary*

31  
32  
33 215 Studies in other European countries have shown that migrants often have poorer health than non-  
34  
35 216 migrants. However, no longitudinal studies have compared the self-reported health (SRH) of  
36  
37  
38 217 migrants and non-migrants SRH in Switzerland. In this study, we focused on the migrant / non-  
39  
40 218 migrant populations of the CoLaus cohort and their SRH.  
41  
42

43 219

### 44 45 46 220 *Comparison with existing literature*

47  
48  
49 221 Scientific literature has shown that a perceived poor SRH is correlated with greater morbidity and  
50  
51 222 mortality. In addition, studies in other European countries have shown that, with regard to SRH,  
52  
53  
54  
55  
56  
57  
58  
59  
60

1  
2  
3 223 most of the groups of migrants and ethnic minorities report poorer health than local and non-migrant  
4  
5 224 populations (6,7,10,11). This was also the case in our unadjusted results (See table 3, 4, 5).  
6  
7

8 225 However, in our statistical model with a complete adjustment of both measured and unmeasured  
9  
10 226 confounding factors, we found no statistically significant difference in SRH between those born  
11  
12 227 outside of Switzerland and in Switzerland. Instead, several SDH and some socio-demographic  
13  
14 228 characteristics appeared to be stronger explanatory variables for SRH than migrant / non-migrant  
15  
16 229 status. In particular, there is a gradient for the level of education and for the monthly income,  
17  
18 230 regardless of the migration status. These gradients are found in other countries, although the strength  
19  
20 231 of the relationship varies somewhat across countries, for different age groups, by health measures  
21  
22 232 used, and by sex of collectives (31,32).  
23  
24  
25  
26  
27

28 233 On the mental health aspects, although migration is often seen as a risk factor contributing to  
29  
30 234 psychopathology and this psychopathology may have an adverse impact on SRH, in this study, the  
31  
32 235 risk of presenting a severe psychiatric illness was not greater among migrants (33–35).  
33  
34

35 236 Finally, in the population born in Switzerland, all categories of civil status have the same risk of  
36  
37 237 reporting poor SRH as people living alone. However, childless migrant couples were less likely to  
38  
39 238 report poor SRH than people living alone, and this risk was even lower for migrant couples with  
40  
41 239 children. This is also reflected in the literature, where migrant women are described as a key player  
42  
43 240 in health - for their health, as well as of their children and their families - single migrants are more  
44  
45 241 likely to view their health as poor both men and women, than those who were married or in a  
46  
47 242 common-law relationship (33–35).  
48  
49  
50  
51

52 243 The strengths of this study are the size of the sample, the rigorous collection of data and the  
53  
54 244 advanced statistical approaches that made it possible to control both measured and unmeasured  
55  
56  
57

1  
2  
3 245 confounding factors. Among the weaknesses, the predominant migration groups included in this  
4  
5 246 study (from other European countries and often >25 years in Switzerland) may be more similar to  
6  
7  
8 247 those born in Switzerland than more recent migrant groups particularly with regard to SRH. Finally,  
9  
10 248 the complex modelling used in this study generates large confidence intervals makes it more  
11  
12 249 difficult to exclude a small influence of the country of birth.  
13  
14  
15  
16 250

17  
18  
19 251 *Implications for Research and/or practice*  
20

21  
22 252 This is a first Swiss cohort study where we compare SRH between migrants and non-migrants  
23  
24 253 populations in Switzerland. After controlling for various factors, we did not observe a difference in  
25  
26 254 SRH based on migrant status. Several markers of socio-economic status were strongly associated  
27  
28  
29 255 with SRH and may explain population-level differences in SRH. The implication in practice is to  
30  
31 256 target these factors when delivering care to migrant populations.  
32  
33  
34 257  
35  
36  
37 258  
38  
39

40 259 **Abbreviations**  
41

42 260 Self-Rated Health (SRH)  
43

44 261 Social determinants of health (SDH)  
45

46 262 Post-Traumatic Stress Disorder (PTSD)  
47

48 263 Socio Economic Status (SES)  
49

50 264 Generalized Linear Mixed Model (GLMM)  
51

52 265 Integrated Nested Laplace Approach (INLA)  
53  
54  
55  
56  
57

1  
2  
3 2664  
5 2676  
7  
8 **268 Declarations**9  
10 **269 Ethics approval and consent to participate**11  
12 270 The institutional Ethics Committee of the University of Lausanne, which afterwards became the13  
14 271 Ethics Commission of Canton Vaud ([www.cer-vd.ch](http://www.cer-vd.ch)) approved the first (reference 33/09, decision15  
16 272 of 23rd February 2009) and the second (reference 26/14, decision of 11th March 2014) follow-ups.17  
18 273 The study was performed in agreement with the Helsinki declaration and its former amendments.19  
20 274 All participants gave their signed informed consent before entering the study.21  
22  
23  
24 27525  
26  
27 **276 Consent to publish**28  
29  
30 277 All participants gave their consent to publish.31  
32 27833  
34  
35 **279 Availability of data and materials**36  
37 280 CoLaus study (<https://www.colaus-psycholaus.ch/>).38  
39 28140  
41  
42 **282 Competing interests**43  
44 283 The authors declare that they have no competing interests.45  
46 28447  
48  
49 **285 Funding**50  
51 286 No additional funding was required for this research.52  
53 287



## 288 **Author contributions**

289 MP had the research proposal and wrote most of the article. MS made the statistical analyses. KS  
290 revised the article for important intellectual content. PB have full access to the data. PB is the  
291 guarantor of the study.

## 293 **Acknowledgements**

294 The CoLaus study was and is supported by research grants from GlaxoSmithKline, the Faculty of  
295 Biology and Medicine of Lausanne, and the Swiss National Science Foundation (grants 33CSCO-  
296 122661, 33CS30-139468 and 33CS30-148401). The funding source had no involvement in the  
297 study design, data collection, analysis and interpretation, writing of the report, or decision to submit  
298 the article for publication.

## 301 **References**

- 302 1. Dinesen C, Nielsen SS, Mortensen LH, Krasnik A. Inequality in self-rated health among  
303 immigrants, their descendants and ethnic Danes: examining the role of socioeconomic position.  
304 *Int J Public Health*. 2011 Oct 1;56(5):503–14.
- 305 2. Iglesias E, Robertson E, Johansson S-E, Engfeldt P, Sundquist J. Women, international  
306 migration and self-reported health. A population-based study of women of reproductive age. *Soc*  
307 *Sci Med*. 2003;56(1):111–24.
- 308 3. Lorant V, Van Oyen H, Thomas I. Contextual factors and immigrants' health status:  
309 double jeopardy. *Health Place*. 2008;14(4):678–92.
- 310 4. Reijneveld SA. Reported health, lifestyles, and use of health care of first generation  
311 immigrants in The Netherlands: do socioeconomic factors explain their adverse position? *J*  
312 *Epidemiol Community Health*. 1998;52(5):298–304.
- 313 5. Benyamini Y, Idler EL. Community studies reporting association between self-rated health  
314 and mortality: additional studies, 1995 to 1998. *Res Aging*. 1999;21(3):392–401.

- 315 6. DeSalvo KB, Bloser N, Reynolds K, He J, Muntner P. Mortality prediction with a single  
316 general self-rated health question. *J Gen Intern Med.* 2006;21(3):267.
- 317 7. Idler EL, Benyamini Y. Self-rated health and mortality: a review of twenty-seven  
318 community studies. *J Health Soc Behav.* 1997;21–37.
- 319 8. Jylhä M. What is self-rated health and why does it predict mortality? Towards a unified  
320 conceptual model. *Soc Sci Med.* 2009;69(3):307–16.
- 321 9. Singh Setia M, Lynch J, Abrahamowicz M, Tousignant P, Quesnel-Vallee A. Self-rated  
322 health in Canadian immigrants: Analysis of the Longitudinal Survey of Immigrants to Canada.  
323 *Geogr Care.* 2011 Mar 1;17(2):658–70.
- 324 10. Lindström M, Sundquist J, Östergren P-O. Ethnic differences in self reported health in  
325 Malmö in southern Sweden. *J Epidemiol Community Health.* 2001;55(2):97–103.
- 326 11. Kaplan GA, Goldberg DE, Everson SA, Cohen RD, Salonen R, Tuomilehto J, et al.  
327 Perceived health status and morbidity and mortality: evidence from the Kuopio ischaemic heart  
328 disease risk factor study. *Int J Epidemiol.* 1996;25(2):259–65.
- 329 12. Ismayilova L, Lee HN, Shaw S, El-Bassel N, Gilbert L, Terlikbayeva A, et al. Mental  
330 Health and Migration: Depression, Alcohol Abuse, and Access to Health Care among Migrants in  
331 Central Asia. *J Immigr Minor Health Cent Minor Public Health.* 2014 Dec;16(6):1138–48.
- 332 13. Hutton K, Nyholm M, Nygren JM, Svedberg P. Self-rated mental health and socio-  
333 economic background: a study of adolescents in Sweden. *BMC Public Health.* 2014;14:394–394.
- 334 14. Islam F, Khanlou N, Tamim H. South Asian populations in Canada: migration and mental  
335 health. *BMC Psychiatry.* 2014;14:154–154.
- 336 15. Mao Z, Zhao X. The effects of social connections on self-rated physical and mental health  
337 among internal migrant and local adolescents in Shanghai, China. *BMC Public Health.*  
338 2012;12:97–97.
- 339 16. Mulki Mölsä, Raija-Leena Punamäki, Samuli I. Saarni, Marja Tiilikainen, Saija Kuittinen,  
340 Marja-Liisa Honkasalo. Mental and somatic health and pre- and post-migration factors among  
341 older Somali refugees in Finland. *Transcult Psychiatry.* 2014 Mar 19;51(4):499–525.
- 342 17. Marmot M, Wilkinson RG. *Social determinants of health.* oxford university press New  
343 York; 2007.
- 344 18. Marmot MG, Shipley MJ, Rose G. Inequalities in death—specific explanations of a  
345 general pattern? *The Lancet.* 1984;323(8384):1003–6.

- 1  
2  
3 346 19. Kawachi I, Daniels N, Robinson DE. Health disparities by race and class: why both matter.  
4 347 Health Aff (Millwood). 2005;24(2):343–52.  
5  
6  
7 348 20. Castañeda H, Holmes SM, Madrigal DS, Young M-ED, Beyeler N, Quesada J.  
8 349 Immigration as a social determinant of health. *Annu Rev Public Health*. 2015;36:375–92.  
9  
10 350 21. Alves L, Azevedo A, Barros H, Vollenweider P, Waeber G, Marques-Vidal P. Prevalence  
11 351 and management of cardiovascular risk factors in Portuguese living in Portugal and Portuguese  
12 352 who migrated to Switzerland. *BMC Public Health*. 2015;15(1):307.  
13  
14  
15 353 22. Marques-Vidal P, Vollenweider P, Waeber G, Paccaud F. Prevalence of overweight and  
16 354 obesity among migrants in Switzerland: association with country of origin. *Public Health Nutr*.  
17 355 2011;14(7):1148–56.  
18  
19  
20 356 23. Loue S. *Assessing Race, Ethnicity and Gender in Health* [Internet]. Springer US; 2006.  
21 357 Available from: <https://books.google.ch/books?id=2MLc1YfMYpkC>  
22  
23 358 24. Eisenstadt SN. *The Absorption of Immigrants: A Comparative Study Based Mainly on the*  
24 359 *Jewish Community in Palestine and the State of Israel* [Internet]. Free Press; 1955. (International  
25 360 library of sociology and social reconstruction). Available from:  
26 361 <https://books.google.ch/books?id=OfBLMQAACAAJ>  
27  
28  
29 362 25. Mangalam J. *Human Migration* [Internet]. 1968 [cited 2018 Feb 9]. Available from:  
30 363 [https://books.google.com/books/about/Human\\_Migration.html?hl=fr&id=CeweBgAAQBAJ](https://books.google.com/books/about/Human_Migration.html?hl=fr&id=CeweBgAAQBAJ)  
31  
32  
33 364 26. Lee ES. A theory of migration. *Demography*. 1966 Mar 1;3(1):47–57.  
34  
35 365 27. Firmann M, Mayor V, Vidal PM, Bochud M, Pécoud A, Hayoz D, et al. The CoLaus  
36 366 study: a population-based study to investigate the epidemiology and genetic determinants of  
37 367 cardiovascular risk factors and metabolic syndrome. *BMC Cardiovasc Disord*. 2008;8(1):6.  
38  
39  
40 368 28. The R-INLA project. Random walk model of order 1 [Internet]. [cited 2018 Oct 22].  
41 369 Available from: <http://www.math.ntnu.no/inla/r-inla.org/doc/latent/rw1.pdf>  
42  
43 370 29. Rue H, Martino S, Chopin N. Approximate Bayesian inference for latent Gaussian models  
44 371 by using integrated nested Laplace approximations. *J R Stat Soc Ser B Stat Methodol*.  
45 372 2009;71(2):319–92.  
46  
47  
48 373 30. Team RC. *R: A language and environment for statistical computing*. R Foundation for  
49 374 Statistical Computing, Vienna, Austria. 2013. 2014.  
50  
51 375 31. Arroyo E, Renart G, Saez M. How the economic recession has changed the likelihood of  
52 376 reporting poor self-rated health in Spain. *Int J Equity Health*. 2015;14(1):149.  
53  
54  
55  
56  
57  
58  
59

32. Kunst AE, Bos V, Lahelma E, Bartley M, Lissau I, Regidor E, et al. Trends in socioeconomic inequalities in self-assessed health in 10 European countries. *Int J Epidemiol*. 2004;34(2):295–305.
33. Bodenmann P, Cornuz J, Vaucher P, Ghali W, Daepfen J-B, Favrat B. A health behaviour cross-sectional study of immigrants and non-immigrants in a Swiss urban general-practice setting. *J Immigr Minor Health*. 2010;12(1):24–32.
34. Smith JP, Kington R. Demographic and economic correlates of health in old age. *Demography*. 1997;34(1):159–70.
35. De Maio FG, Kemp E. The deterioration of health status among immigrants to Canada. *Glob Public Health*. 2010;5(5):462–78.

## Tables & Figures

|                                                                                             | Period 1 2003-2006<br>(n=6,733) | Period 2 2009-2012<br>(n=5,064) | Period 3 2014-2017<br>(4,881) |
|---------------------------------------------------------------------------------------------|---------------------------------|---------------------------------|-------------------------------|
| Variable                                                                                    | N (%)                           | N (%)                           | N (%)                         |
| <b>Self-reported Health Status</b> (Good or Very Good)                                      | -                               | 4,164 (82%)                     | 3,743 (78%)                   |
| Fair, Poor or Very Poor                                                                     | -                               | 873 (17%)                       | 1,088 (22%)                   |
| <b>Country of birth (Other than Switzerland)</b>                                            | 2,700 (40%)                     | 1,880 (37%)                     | 1,818 (37%)                   |
| <b>Switzerland</b>                                                                          | 4,031 (60%)                     | 3,184 (63%)                     | 3,062 (63%)                   |
| <b>Socio Economical Status</b> quantiles following Hollingshead including relatives (1=<20) | 271 (4%)                        | 130 (3%)                        | -                             |
| 21-39                                                                                       | 658 (10%)                       | 386 (8%)                        | -                             |
| 30-39                                                                                       | 1027 (15%)                      | 781 (15%)                       | -                             |
| 40-54                                                                                       | 982 (15%)                       | 905 (18%)                       | -                             |
| =>55                                                                                        | 781 (12%)                       | 624 (12%)                       | -                             |
| Missing                                                                                     | 3,014 (45%)                     | 2,238 (44%)                     |                               |
| <b>Educational level</b> (Mandatory education)                                              | 1,397 (21%)                     | 878 (17%)                       | 839 (17%)                     |
| Apprenticeship                                                                              | 2,377 (35%)                     | 1,796 (35%)                     | 1,749 (36%)                   |
| High school                                                                                 | 1,625 (24%)                     | 1,306 (26%)                     | 1,258 (26%)                   |
| University education                                                                        | 1,320 (20%)                     | 1,079 (21%)                     | 1,031 (21%)                   |
| <b>Job type</b> (High)                                                                      | 803 (12%)                       | 458 (9%)                        | 476 (11%)                     |
| Middle                                                                                      | 2662 (40%)                      | 1,111 (22%)                     | 714 (16%)                     |
| Low                                                                                         | 1306 (19%)                      | 1,479 (29%)                     | 939 (22%)                     |
| Not working                                                                                 | 1945 (29%)                      | 1,772 (35%)                     | 2,205 (51%)                   |
| <b>Current situation</b> (living alone)                                                     | -                               | 1,414 (28%)                     | 1,286 (30%)                   |

|    |                                                                    |             |             |             |
|----|--------------------------------------------------------------------|-------------|-------------|-------------|
| 1  |                                                                    |             |             |             |
| 2  |                                                                    |             |             |             |
| 3  |                                                                    |             |             |             |
| 4  |                                                                    |             |             |             |
| 5  |                                                                    |             |             |             |
| 6  |                                                                    |             |             |             |
| 7  |                                                                    |             |             |             |
| 8  |                                                                    |             |             |             |
| 9  |                                                                    |             |             |             |
| 10 |                                                                    |             |             |             |
| 11 |                                                                    |             |             |             |
| 12 |                                                                    |             |             |             |
| 13 |                                                                    |             |             |             |
| 14 |                                                                    |             |             |             |
| 15 |                                                                    |             |             |             |
| 16 |                                                                    |             |             |             |
| 17 |                                                                    |             |             |             |
| 18 |                                                                    |             |             |             |
| 19 |                                                                    |             |             |             |
| 20 |                                                                    |             |             |             |
| 21 |                                                                    |             |             |             |
| 22 |                                                                    |             |             |             |
| 23 |                                                                    |             |             |             |
| 24 |                                                                    |             |             |             |
| 25 |                                                                    |             |             |             |
| 26 |                                                                    |             |             |             |
| 27 |                                                                    |             |             |             |
| 28 |                                                                    |             |             |             |
| 29 |                                                                    |             |             |             |
| 30 |                                                                    |             |             |             |
| 31 |                                                                    |             |             |             |
| 32 |                                                                    |             |             |             |
| 33 |                                                                    |             |             |             |
| 34 |                                                                    |             |             |             |
| 35 |                                                                    |             |             |             |
| 36 |                                                                    |             |             |             |
| 37 |                                                                    |             |             |             |
| 38 |                                                                    |             |             |             |
| 39 |                                                                    |             |             |             |
| 40 |                                                                    |             |             |             |
| 41 |                                                                    |             |             |             |
| 42 |                                                                    |             |             |             |
| 43 |                                                                    |             |             |             |
| 44 |                                                                    |             |             |             |
| 45 |                                                                    |             |             |             |
| 46 |                                                                    |             |             |             |
| 47 |                                                                    |             |             |             |
| 48 |                                                                    |             |             |             |
| 49 |                                                                    |             |             |             |
| 50 |                                                                    |             |             |             |
| 51 |                                                                    |             |             |             |
| 52 |                                                                    |             |             |             |
| 53 |                                                                    |             |             |             |
| 54 |                                                                    |             |             |             |
| 55 |                                                                    |             |             |             |
| 56 |                                                                    |             |             |             |
| 57 |                                                                    |             |             |             |
| 58 |                                                                    |             |             |             |
| 59 |                                                                    |             |             |             |
| 60 |                                                                    |             |             |             |
|    | Single parent family                                               | -           | 285 (6%)    | 228 (5%)    |
|    | Couple without children                                            | -           | 1,757 (35%) | 1,508 (35%) |
|    | Couple with children                                               | -           | 1,547 (31%) | 1,074 (25%) |
|    | Missing                                                            | -           | 61 (1%)     | 238 (5%)    |
|    | <b>Current professional status (Manoeuvre)</b>                     | -           | 207 (4%)    | 138 (3%)    |
|    | Qualified worker                                                   | -           | 249 (5%)    | 194 (4%)    |
|    | Farmer                                                             | -           | 7 (0.1%)    | 8 (0.2%)    |
|    | Non qualified employee                                             | -           | 262 (5%)    | 147 (3%)    |
|    | Qualified employee (f.e. secretary)                                | -           | 781 (15%)   | 543 (11%)   |
|    | Low manager                                                        | -           | 789 (16%)   | 247 (5%)    |
|    | Middle manager                                                     | -           | 335 (7%)    | 515 (11%)   |
|    | Top manager                                                        | -           | 262 (5%)    | 363 (7%)    |
|    | Liberal professional (medical doctor, lawyer)                      | -           | 197 (4%)    | 145 (3%)    |
|    | Not employed or missing                                            | -           | 1,975 (39%) | 2,581 (53%) |
|    | <b>Monthly household gross income (&lt;2.999 CHF)</b>              | -           | -           | 253 (6%)    |
|    | 3000-4999 CHF                                                      | -           | -           | 656 (15%)   |
|    | 5000-6999 CHF                                                      | -           | -           | 792 (18%)   |
|    | 7000-9499 CHF                                                      | -           | -           | 715 (17%)   |
|    | 9500-13000 CHF                                                     | -           | -           | 543 (13%)   |
|    | > 13000 CHF                                                        | -           | -           | 466 (11%)   |
|    | Refused or missing                                                 | -           | -           | 909 (21%)   |
|    | <b>Do you currently drink alcohol (no)</b>                         | 1505 (22%)  | 878 (17%)   | 939 (19%)   |
|    | Yes                                                                | 5221 (78%)  | 4123 (82%)  | 3,419 (70%) |
|    | Missing                                                            | 7 (0.1%)    | 63 (1%)     | 523 (11%)   |
|    | <b>Gender (Man)</b>                                                | 3,189 (47%) | 2,357 (47%) | 2,193 (45%) |
|    | Women                                                              | 3,544 (53%) | 2,707 (53%) | 2,688 (55%) |
|    | <b>Age category (0-44 years)</b>                                   | 1,987 (30%) | -           | -           |
|    | 45-54 years                                                        | 1,967 (29%) | -           | -           |
|    | 55-64 years                                                        | 1,778 (26%) | -           | -           |
|    | 65-74 years                                                        | 988 (15%)   | -           | -           |
|    | > 75 years                                                         | 13 (0.2%)   | -           | -           |
|    | <b>How many years have you lived in Switzerland (&lt;25 years)</b> | 1,389 (21%) | -           | -           |
|    | 25-39 years                                                        | 1,274 (19%) | -           | -           |
|    | 40-48 years                                                        | 1,407 (21%) | -           | -           |
|    | 49-59 years                                                        | 1,230 (18%) | -           | -           |
|    | 60-75 years                                                        | 1,284 (19%) | -           | -           |

390  
391 Table 1. Descriptive statistics of demographic characteristics and variables for the three periods analyzed.  
392 It should be noted that several variables have missing data for one or two waves of CoLaus. This has been  
393 taken into account in the context of the Bayesian analysis which takes into account the missing values in  
394 the treatment of uncertainty.  
395

396

| Time period           | Group                   | Self-reported health status |                |              |            |             |
|-----------------------|-------------------------|-----------------------------|----------------|--------------|------------|-------------|
|                       |                         | Very good                   | Good           | Fair         | Poor       | Very poor   |
| Period 2<br>2009-2012 | Born in Switzerland     | 838<br>(26%)                | 1,870<br>(59%) | 416<br>(13%) | 38<br>(1%) | 4<br>(0.1%) |
|                       | Born in another country | 381<br>(20%)                | 1,075<br>(57%) | 362<br>(19%) | 44<br>(2%) | 9<br>(0.5%) |
| Period 3<br>2014-2017 | Born in Switzerland     | 702<br>(23%)                | 1,731<br>(57%) | 537<br>(18%) | 54<br>(2%) | 6<br>(0.2%) |
|                       | Born in another country | 330<br>(18%)                | 979<br>(54%)   | 429<br>(24%) | 56<br>(3%) | 6<br>(0.3%) |

397

398

399

400

401

402

Table 2. Proportions of SHR during waves 2 (2009-2012) and 3 (2014-2017), stratified by place of birth (non-migrants = born in Switzerland vs. migrants = born in another country). The very good and good categories (perceived health status) were transformed into a single variable - good health - and the average, poor and very poor health categories perceived as a second variable - poor health -

| Self Rated Health                                                                              | OR (95% Credibility interval) | Prob( log(OR) )>0 |
|------------------------------------------------------------------------------------------------|-------------------------------|-------------------|
| Country of birth (Other than Switzerland)                                                      |                               |                   |
| Switzerland                                                                                    | 1.09(0.52-2.31)               | 0.5932            |
| <b>Socio Economical Status quantiles following Hollingshead including relatives (1=&lt;20)</b> |                               |                   |
| 21-39                                                                                          | 0.92(0.65-1.30)               | 0.6821            |
| 30-39                                                                                          | 1.11(0.81-1.51)               | 0.7439            |
| 40-54                                                                                          | 0.83(0.60-1.14)               | 0.8754            |
| =>55                                                                                           | 0.82(0.55-1.20)               | 0.8479            |
| <b>Educational level (Mandatory education)</b>                                                 |                               |                   |
| Apprenticeship                                                                                 | 0.67(0.49-0.90)               | 0.9960*           |
| High school                                                                                    | 0.63(0.45-0.84)               | 0.9992*           |
| University education                                                                           | 0.40(0.28-0.58)               | 0.9999*           |
| <b>Job type (High)</b>                                                                         |                               |                   |
| Middle                                                                                         | 0.58(0.35-0.95)               | 0.9853*           |
| Low                                                                                            | 0.60(0.41-0.88)               | 0.9958*           |
| Not working                                                                                    | 0.62(0.42-0.92)               | 0.9917*           |
| <b>Current situation (living alone)</b>                                                        |                               |                   |

|                                                                                         |                 |         |
|-----------------------------------------------------------------------------------------|-----------------|---------|
| Single parent family                                                                    | 1.17(0.78-1.78) | 0.7758  |
| Couple without children                                                                 | 0.84(0.64-1.09) | 0.9115  |
| Couple with children                                                                    | 0.89(0.68-1.16) | 0.8084  |
| <b>Current professional status (manoeuvre)</b>                                          |                 |         |
| Qualified worker                                                                        | 0.81(0.45-1.45) | 0.7646  |
| Farmer                                                                                  | 0.58(0.04-7.49) | 0.6631  |
| Non-qualified worker (office assistant)                                                 | 1.09(0.70-1.70) | 0.6530  |
| Qualified employee (f.e. secretary)                                                     | 0.90(0.61-1.32) | 0.7119  |
| Low manager                                                                             | 0.94(0.59-1.49) | 0.6063  |
| Middle manager                                                                          | 1.03(0.62-1.69) | 0.5382  |
| Top manager                                                                             | 1.13(0.85-1.51) | 0.7991  |
| <b>Monthly household gross income (&lt; 2.999 CHF)</b>                                  |                 |         |
| 3000-4999 CHF                                                                           | 1.04(0.73-1.47) | 0.5761  |
| 5000-6999 CHF                                                                           | 1.01(0.70-1.46) | 0.5187  |
| 7000-9499 CHF                                                                           | 0.68(0.45-1.02) | 0.9690* |
| 9500-13000 CHF                                                                          | 1.21(0.76-1.92) | 0.7886  |
| > 13000 CHF                                                                             | 0.55(0.29-1.06) | 0.9640* |
| <b>Do you currently drink alcohol (no)</b>                                              |                 |         |
| Yes                                                                                     | 0.63(0.51-0.79) | 0.9999* |
| <b>Gender (Man)</b>                                                                     |                 |         |
| Women                                                                                   | 1.28(1.02-1.60) | 0.9850* |
| <b>Age category (0-45 years)</b>                                                        |                 |         |
| 45-54 years                                                                             | 1.17(0.82-1.68) | 0.8047  |
| 55-64 years                                                                             | 1.44(0.97-2.15) | 0.9643* |
| 65-74 years                                                                             | 1.29(0.82-2.04) | 0.8667  |
| > 75 years                                                                              | 1.17(0.67-2.06) | 0.7130  |
| <b>How many years have you been living in Switzerland (First quintile &lt;32 years)</b> |                 |         |
| Second quintile                                                                         | 0.92(0.72-1.18) | 0.7364  |
| Third quintile                                                                          | 0.92(0.70-1.22) | 0.7108  |
| Fourth quintile                                                                         | 0.93(0.68-1.28) | 0.6691  |



|                |                 |        |
|----------------|-----------------|--------|
| Fifth quintile | 1.03(0.68-1.57) | 0.5552 |
|----------------|-----------------|--------|

403  
404  
405  
406

Table 3. Results of the mixed models of the explanatory variables for the perceived health of the entire cohort.

| <b>Self Rated Health</b>                                                                       | OR (95% Credibility interval) | Prob( log(OR) )>0 |
|------------------------------------------------------------------------------------------------|-------------------------------|-------------------|
| <b>Socio Economical Status quantiles following Hollingshead including relatives (1=&lt;20)</b> |                               |                   |
| 21-39                                                                                          | 1.04(0.63-1.73)               | 0.5646            |
| 30-39                                                                                          | 0.94(0.63-1.39)               | 0.6305            |
| 40-54                                                                                          | 1.18(0.78-1.77)               | 0.7817            |
| =>55                                                                                           | 1.22(0.74-2.03)               | 0.7812            |
| <b>Educational level (Mandatory education)</b>                                                 |                               |                   |
| Apprenticeship                                                                                 | 0.97(0.65-1.46)               | 0.5584            |
| High school                                                                                    | 0.97(0.63-1.49)               | 0.5622            |
| University education                                                                           | 1.15(0.68-1.93)               | 0.6961            |
| <b>Job type (High)</b>                                                                         |                               |                   |
| Middle                                                                                         | 1.45(0.75-2.78)               | 0.8664            |
| Low                                                                                            | 1.36(0.82-2.25)               | 0.8807            |
| Not working                                                                                    | 1.30(0.74-2.29)               | 0.8202            |
| <b>Current situation (living alone)</b>                                                        |                               |                   |
| Single parent family                                                                           | 0.82(0.46-1.47)               | 0.7483            |
| Couple without children                                                                        | 0.93(0.67-1.29)               | 0.6620            |
| Couple with children                                                                           | 0.59(0.40-0.87)               | 0.9965*           |
| <b>Current professional status (manoeuvre)</b>                                                 |                               |                   |
| Qualified worker                                                                               | 1.24(0.49-3.13)               | 0.6780            |
| Farmer                                                                                         | 1.59(0.05-52.74)              | 0.6009            |
| Non-qualified worker (office assistant)                                                        | 0.81(0.39-1.66)               | 0.7221            |
| Qualified employe (f.e. secretary)                                                             | 0.91(0.53-1.57)               | 0.6357            |
| Low manager                                                                                    | 0.97(0.53-1.78)               | 0.5354            |
| Middle manager                                                                                 | 0.62(0.31-1.25)               | 0.9117            |
| Top manager                                                                                    | 0.99(0.69-1.45)               | 0.5033            |



|                                                        |                 |         |
|--------------------------------------------------------|-----------------|---------|
| Liberal professional (medical doctor, lawyer)          | 2.52(0.91-6.96) | 0.9623  |
| <b>Monthly household gross income (&lt; 2.999 CHF)</b> |                 |         |
| 3000-4999 CHF                                          | 1.30(0.81-2.10) | 0.8636  |
| 5000-6999 CHF                                          | 1.24(0.78-1.99) | 0.8177  |
| 7000-9499 CHF                                          | 1.39(0.82-2.37) | 0.8876  |
| 9500-13000 CHF                                         | 0.92(0.51-1.68) | 0.6051  |
| > 13000 CHF                                            | 1.24(0.56-2.74) | 0.7032  |
| <b>Do you currently drink alcohol (no)</b>             |                 |         |
| Yes                                                    | 1.01(0.75-1.34) | 0.5188  |
| <b>Gender (Man)</b>                                    |                 |         |
| Women                                                  | 0.73(0.55-0.98) | 0.9826* |
| <b>Age category (0-45 years)</b>                       |                 |         |
| 45-54 years                                            | 0.80(0.46-1.40) | 0.7833  |
| 55-64 years                                            | 0.62(0.33-1.15) | 0.9363  |
| 65-74 years                                            | 0.45(0.22-0.92) | 0.9862* |
| > 75 years                                             | 0.75(0.35-1.63) | 0.7673  |

407  
408 Table 4. Results of the mixed models of the explanatory variables for the perceived health of people born  
409 in Switzerland.  
410  
411

| <b>Self Rated Health</b>                                                                       | OR (95% Credibility interval) | Prob( log(OR) )>0 |
|------------------------------------------------------------------------------------------------|-------------------------------|-------------------|
| <b>Socio Economical Status quantiles following Hollingshead including relatives (1=&lt;20)</b> |                               |                   |
| 21-39                                                                                          | 1.04(0.63-1.73)               | 0.5646            |
| 30-39                                                                                          | 0.94(0.63-1.39)               | 0.6305            |
| 40-54                                                                                          | 1.18(0.78-1.77)               | 0.7817            |
| =>55                                                                                           | 1.22(0.74-2.03)               | 0.7812            |
| <b>Educational level (Mandatory education)</b>                                                 |                               |                   |
| Apprenticeship                                                                                 | 0.97(0.65-1.46)               | 0.5584            |
| High school                                                                                    | 0.97(0.63-1.49)               | 0.5622            |
| University education                                                                           | 1.15(0.68-1.93)               | 0.6961            |
| <b>Job type (High)</b>                                                                         |                               |                   |

|                                                        |                  |         |
|--------------------------------------------------------|------------------|---------|
| Middle                                                 | 1.45(0.75-2.78)  | 0.8664  |
| Low                                                    | 1.36(0.82-2.25)  | 0.8807  |
| Not working                                            | 1.30(0.74-2.29)  | 0.8202  |
| <b>Current situation (living alone)</b>                |                  |         |
| Single parent family                                   | 0.82(0.46-1.47)  | 0.7483  |
| Couple without children                                | 0.93(0.67-1.29)  | 0.6620  |
| Couple with children                                   | 0.59(0.40-0.87)  | 0.9965* |
| <b>Current professional status (manoeuvre)</b>         |                  |         |
| Qualified worker                                       | 1.24(0.49-3.13)  | 0.6780  |
| Farmer                                                 | 1.59(0.05-52.74) | 0.6009  |
| Non-qualified worker (office assistant)                | 0.81(0.39-1.66)  | 0.7221  |
| Qualified employe (f.e. secretary)                     | 0.91(0.53-1.57)  | 0.6357  |
| Low manager                                            | 0.97(0.53-1.78)  | 0.5354  |
| Middle manager                                         | 0.62(0.31-1.25)  | 0.9117  |
| Top manager                                            | 0.99(0.69-1.45)  | 0.5033  |
| Liberal professional (medical doctor, lawyer)          | 2.52(0.91-6.96)  | 0.9623  |
| <b>Monthly household gross income (&lt; 2.999 CHF)</b> |                  |         |
| 3000-4999 CHF                                          | 1.30(0.81-2.10)  | 0.8636  |
| 5000-6999 CHF                                          | 1.24(0.78-1.99)  | 0.8177  |
| 7000-9499 CHF                                          | 1.39(0.82-2.37)  | 0.8876  |
| 9500-13000 CHF                                         | 0.92(0.51-1.68)  | 0.6051  |
| > 13000 CHF                                            | 1.24(0.56-2.74)  | 0.7032  |
| <b>Do you currently drink alcohol (no)</b>             |                  |         |
| Yes                                                    | 1.01(0.75-1.34)  | 0.5188  |
| <b>Gender (Man)</b>                                    |                  |         |
| Women                                                  | 0.73(0.55-0.98)  | 0.9826* |
| <b>Age category (0-45 years)</b>                       |                  |         |
| 45-54 years                                            | 0.80(0.46-1.40)  | 0.7833  |
| 55-64 years                                            | 0.62(0.33-1.15)  | 0.9363  |
| 65-74 years                                            | 0.45(0.22-0.92)  | 0.9862* |
| > 75 years                                             | 0.75(0.35-1.63)  | 0.7673  |

1  
2  
3  
4  
5  
6  
7  
8  
9  
10  
11  
12  
13  
14  
15  
16  
17  
18  
19  
20  
21  
22  
23  
24  
25  
26  
27  
28  
29  
30  
31  
32  
33  
34  
35  
36  
37  
38  
39  
40  
41  
42  
43  
44  
45  
46  
47  
48  
49  
50  
51  
52  
53  
54  
55  
56  
57  
58  
59  
60

412  
413 Table 5. Results of the mixed models of the explanatory variables for the perceived health of people born  
414 outside of Switzerland.

For peer review only

STROBE Statement—Checklist of items that should be included in reports of *cohort studies*

|                           | Item No | Recommendation                                                                        |
|---------------------------|---------|---------------------------------------------------------------------------------------|
| <b>Title and abstract</b> | 1       | Lines: 1-2<br>Lines: 30-48                                                            |
| <b>Introduction</b>       |         |                                                                                       |
| Background/rationale      | 2       | Lines: 69-85                                                                          |
| Objectives                | 3       | Lines: 87-91                                                                          |
| <b>Methods</b>            |         |                                                                                       |
| Study design              | 4       | Lines: 37-38                                                                          |
| Setting                   | 5       | Lines 94-109                                                                          |
| Participants              | 6       | Lines: 99-103<br>Not applicable                                                       |
| Variables                 | 7       | Lines: 111-124                                                                        |
| Data sources/ measurement | 8*      | Lines: 126-145                                                                        |
| Bias                      | 9       | Lines 139-145                                                                         |
| Study size                | 10      | Lines:147-155                                                                         |
| Quantitative variables    | 11      | Lines:126-145                                                                         |
| Statistical methods       | 12      | Lines 126-162<br>Lines: 139-145<br>Lines: 126-137<br>Lines: 126-162<br>Lines: 147-160 |
| <b>Results</b>            |         |                                                                                       |
| Participants              | 13*     | Lines: 167-169<br>Not Applicable<br>Not Applicable                                    |
| Descriptive data          | 14*     | Lines: 167-169<br>Tables 1 and 2<br>Tables 1 and 2                                    |
| Outcome data              | 15*     | Report numbers of outcome events or summary measures over time                        |
| Main results              | 16      | Lines: 170-211<br>Not Applicable<br>Not Applicable                                    |
| Other analyses            | 17      | Not Applicable                                                                        |
| <b>Discussion</b>         |         |                                                                                       |
| Key results               | 18      | Lines:220-249                                                                         |
| Limitations               | 19      | Lines_245-249                                                                         |
| Interpretation            | 20      | Lines:251-259                                                                         |
| Generalisability          | 21      | Lines:251-259                                                                         |
| <b>Other information</b>  |         |                                                                                       |
| Funding                   | 22      | Line:286                                                                              |

\*Give information separately for exposed and unexposed groups.

**Note:** An Explanation and Elaboration article discusses each checklist item and gives methodological background and published examples of transparent reporting. The STROBE checklist is best used in conjunction with this article (freely available on the Web sites of PLoS Medicine at <http://www.plosmedicine.org/>, Annals of Internal Medicine at <http://www.annals.org/>, and Epidemiology at <http://www.epidem.com/>). Information on the STROBE Initiative is available at <http://www.strobe-statement.org>.

# BMJ Open

## Longitudinal Panel Data Study of Self-Rated health among Migrants in French-speaking Switzerland, 2003-2017

|                                 |                                                                                                                                                                                                                                                                                                                                                                                                                                                                                                                                                                                                                |
|---------------------------------|----------------------------------------------------------------------------------------------------------------------------------------------------------------------------------------------------------------------------------------------------------------------------------------------------------------------------------------------------------------------------------------------------------------------------------------------------------------------------------------------------------------------------------------------------------------------------------------------------------------|
| Journal:                        | <i>BMJ Open</i>                                                                                                                                                                                                                                                                                                                                                                                                                                                                                                                                                                                                |
| Manuscript ID                   | bmjopen-2019-035812.R1                                                                                                                                                                                                                                                                                                                                                                                                                                                                                                                                                                                         |
| Article Type:                   | Original research                                                                                                                                                                                                                                                                                                                                                                                                                                                                                                                                                                                              |
| Date Submitted by the Author:   | 15-Apr-2020                                                                                                                                                                                                                                                                                                                                                                                                                                                                                                                                                                                                    |
| Complete List of Authors:       | Mota, Pau; University Center for General Medicine and Public Health, Department of Vulnerabilities and Social Medicine<br>Saez, Marc; Universitat de Girona, Research Group on Statistics, Econometrics and Health (GRECS); CIBER of Epidemiology and Public Health (CIBERESP),<br>Selby, Kevin; University Center for General Medicine and Public Health, Department the Policlinics<br>Bodenmann, Patrick; University Center for General Medicine and Public Health, Department of Vulnerabilities and Social Medicine; University Center for General Medicine and Public Health, Department the Policlinics |
| <b>Primary Subject Heading</b>: | Sociology                                                                                                                                                                                                                                                                                                                                                                                                                                                                                                                                                                                                      |
| Secondary Subject Heading:      | Public health                                                                                                                                                                                                                                                                                                                                                                                                                                                                                                                                                                                                  |
| Keywords:                       | SOCIAL MEDICINE, STATISTICS & RESEARCH METHODS, PUBLIC HEALTH                                                                                                                                                                                                                                                                                                                                                                                                                                                                                                                                                  |
|                                 |                                                                                                                                                                                                                                                                                                                                                                                                                                                                                                                                                                                                                |

SCHOLARONE™  
Manuscripts

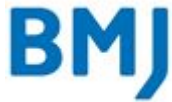

I, the Submitting Author has the right to grant and does grant on behalf of all authors of the Work (as defined in the below author licence), an exclusive licence and/or a non-exclusive licence for contributions from authors who are: i) UK Crown employees; ii) where BMJ has agreed a CC-BY licence shall apply, and/or iii) in accordance with the terms applicable for US Federal Government officers or employees acting as part of their official duties; on a worldwide, perpetual, irrevocable, royalty-free basis to BMJ Publishing Group Ltd ("BMJ") its licensees and where the relevant Journal is co-owned by BMJ to the co-owners of the Journal, to publish the Work in this journal and any other BMJ products and to exploit all rights, as set out in our [licence](#).

The Submitting Author accepts and understands that any supply made under these terms is made by BMJ to the Submitting Author unless you are acting as an employee on behalf of your employer or a postgraduate student of an affiliated institution which is paying any applicable article publishing charge ("APC") for Open Access articles. Where the Submitting Author wishes to make the Work available on an Open Access basis (and intends to pay the relevant APC), the terms of reuse of such Open Access shall be governed by a Creative Commons licence – details of these licences and which [Creative Commons](#) licence will apply to this Work are set out in our licence referred to above.

Other than as permitted in any relevant BMJ Author's Self Archiving Policies, I confirm this Work has not been accepted for publication elsewhere, is not being considered for publication elsewhere and does not duplicate material already published. I confirm all authors consent to publication of this Work and authorise the granting of this licence.

1  
2  
3  
4  
5  
6  
7  
8  
9  
10  
11  
12  
13  
14  
15  
16  
17  
18  
19  
20  
21  
22  
23  
24  
25  
26  
27  
28  
29  
30  
31  
32  
33  
34  
35  
36  
37  
38  
39  
40  
41  
42  
43  
44  
45  
46  
47  
48  
49  
50  
51  
52  
53  
54  
55  
56  
57  
58  
59  
60

1                    **Longitudinal Panel Data Study of Self-Rated health among Migrants**  
2                    **in French-speaking Switzerland, 2003-2017.**

3                    Mota P<sup>1\*</sup>, Saez M<sup>2,3</sup>, Selby K<sup>4</sup>, Bodenmann P.<sup>1,4</sup>

4  
5 \* corresponding author:

6  
7 Department of Vulnerabilities and Social Medicine,  
8 University Center for General Medicine and Public Health  
9 44, Rue du Bugnon. CH – 1011 Lausanne, Switzerland  
10 Phone: +41787708423  
11 Email: paumotamoya@gmail.com  
12

13 1. Department of Vulnerabilities and Social Medicine, University Center for General Medicine  
14 and Public Health, Lausanne, Switzerland.

15  
16 2. Research Group on Statistics, Econometrics and Health (GRECS), University of  
17 Girona, Girona, Spain.

18 3. CIBER of Epidemiology and Public Health (CIBERESP), Madrid, Spain

19 4. Department of the Polyclinics, University Center for General Medicine and Public Health,  
20 Lausanne, Switzerland.

21  
22 Email addresses:

23 Mota P: paumotamoya@gmail.com

24 Saez M: marc.saez@udg.edu

25 Selby K: kevin.selby@hospvd.ch

26 Bodenmann P: patrick.bodenmann@hospvd.ch  
27

## Abstract

**Introduction:** Studies have documented poorer health among migrants than natives of several European countries, but little is known for Switzerland. We assessed the association between country of birth, socio-economic factors and self-reported health in a prospective cohort of adults living in Lausanne, Switzerland.

**Methods:** We used the data from the Colaus panel data study for three periods: 2003-6 (n=6733), 2009-12 (n=5064) and 2014-17 (n=4555) corresponding to 35% of the source population. The response variable was self-reported health (SRH). Main explanatory variables were socioeconomic status, educational level, professional status, income, gender, age and years in Switzerland. The main covariate was country of birth, dichotomized as born in Switzerland or not. We specified random effects logistic regressions and used Bayesian methods for the inference.

**Results:** Being born outside of Switzerland was not associated with worse SRH (OR 1.09 (95%CI 0.52-2.31)). Several other patient variables were, however, predictive of poor health. Educational level was inversely associated with the risk of reporting poor health. Monthly household income showed a gradient where higher income was associated with lower odds of reporting poor SRH, for both for migrants and non-migrants. Migrant women had lower odds of reporting poor SRH than men (OR=0.73, CI=0.55-0.98). Migrant people living in couple have less risk of reporting poor SRH than people who live alone and the risk is lower for migrant people living in couple with children (OR=0.66, 95% CI=0.55-0.80).

**Conclusions:** Migrant status was not associated with poorer SRH. However, differences in SRH were observed based on gender, age and several social determinants of health.

Total word count: 2147. Number of tables: 4

**Keywords:** migration, self-rated health, social determinants of health, longitudinal study.



## 51 **Article summary**

### 52 *Strengths and limitations of this study*

- 53 • The strengths of this study are the large size of the sample and rigorous collection of data.
- 54 • Among the weaknesses, the predominant migration groups included in this study (from other  
55 European countries and often >25 years in Switzerland) may be more similar to those born  
56 in Switzerland, limiting the generalizability of the results.
- 57 • The lack of recent migrants in the sample is one of the main limitations of the current study.

## 59 **Introduction**

60 Differences in Self-Rated Health (SRH) between migrants and natives have been documented in  
61 several European countries but not yet in Switzerland (1–4). SRH is a well-established indicator  
62 used in epidemiology and public health research and is an independent predictor of health outcomes  
63 such as morbidity and mortality (5–9). Numerous studies in European countries have reported that  
64 in regard to SRH, most migrant and ethnic minority groups studied appear, on average, to have  
65 lower health status compared with the majority population (6,7,10,11). Moreover, SRH appears to  
66 be associated with patient's mental health (12–16).

67  
68 Alternatively, differences in health status could be attributable to migrants being of lower socio-  
69 economic status than non-migrants, and this key factor must be adequately accounted for when  
70 comparing SRH (17). The scientific evidence of the social determinants of health (SDH) is well-  
71 known (17–19). Socioeconomic status is linked to overall health status not only through the direct  
72 physical effects of exposure to better or worse material conditions, but also as a result of one's  
73 position in the social hierarchy (17,18). The migratory process often creates a period of vulnerability

74 after arrival in the host country, as well as a sharp change in the socio-economic status that has an  
75 impact on health condition. Some authors even consider the migratory process as a SDH (20).

76  
77 Our main objective was to investigate differences in SRH of migrants compared to non-migrants in  
78 a representative cohort of Swiss adults followed for 10+ years. We focused on migrants as people  
79 born outside Switzerland and we analysed differences on country of birth and the number of years  
80 living in Switzerland. We focused on socioeconomic status and the specific characteristics of  
81 migrant Cohort patients compared to individuals who reported being born in Switzerland (21–26).

## 83 **Methods**

### 84 *Population*

85 We used data from the Colaus cohort in Lausanne, Switzerland, and from the PsyCoLaus study, a  
86 subsample from the larger CoLaus study focused on mental health. The Colaus cohort is a simple,  
87 non-stratified random sample of 19,830 subjects (corresponding to 35% of the source population)  
88 invited to participate. The CoLaus cohort is a population-based study designed to assess the  
89 prevalence and determinants of cardiovascular risk factors and diseases in Lausanne, a city of  
90 145,000 inhabitants of whom 62,000 (43%) were born outside of Switzerland.

91 The source population was defined as all subjects aged between 35 and 75 years registered in the  
92 population register of the city. The inclusion criteria were to sign the written informed consent and  
93 be willing to take part in the study.

94 Its aims and sampling strategy have been reported previously (27).

### 95 *Data collected*

1  
2  
3 96 Recruitment was performed between 2003 and 2006 and included 6733 participants. The first  
4  
5 97 follow-up visit was conducted between April 2009 and September 2012 and included 5064  
6  
7 98 participants; the second follow-up was conducted between May 2014 and April 2017 and included  
8  
9 99 4555 participants. The first and second follow-ups included all participants willing to be re-  
10  
11  
12 100 contacted. For this study, data from the baseline study and both follow-up examinations was used.

### 101 *Measurement*

102 The response variable is SRH from self reported Likert scale that we transformed into a dichotomic  
103 variable. The SRH has been collected since the second period (2009-2012). The following  
104 categories: very good and good transformed as a single variable -good health- and categories fair,  
105 bad and very bad transformed as a single variable -poor health-. We also considered the mental  
106 health as a dependent or response variable through 3 main different indicators (each categorized as  
107 present or absent (1 or 0 respectively): Anxiety disorders (General anxiety, trouble panic, social  
108 phobia, agoraphobia, other), Depressive disorders (atypical depressive disorder, depressive  
109 disorder, other) and the Post-Traumatic Stress Disorder (PTSD). Participants born in other  
110 countries, i.e. outside Switzerland, were grouped in a single category (n=1191).

111  
112 The main explanatory variables were being born outside Switzerland, the country of birth and the  
113 years living in Switzerland. We included interactions between being born abroad and the years  
114 living in Switzerland with all explanatory variables. The control variables were gender, age, the  
115 Socio Economic Status (SES) following the Hollingshead scale, the educational level, job type,  
116 current professional status, monthly household gross income and alcohol consumption.

### 117 118 *Statistical analysis*

1  
2  
3 119 We compared individuals by using Student's t-test and the Mann-Whitney U test for quantitative  
4  
5 120 variables and Pearson's chi-square for qualitative variables. For the multivariable analysis, we used  
6  
7  
8 121 a Generalized Linear Mixed Model (GLMM) with binomial response and a logistic link,  
9

10 122

$$12 123 \log \left( \frac{\text{Pr ob}(Y_{it}=1)}{1 - \text{Pr ob}(Y_{it}=1)} \right) = \eta_{it}$$

14 124

15  
16  
17 125  
18  
19 126 We included in the linear predictor of each individual in the logistic model, the explanatory  
20  
21 127 variables of interest that could explain the probability of being a case (i.e. poor SRH, presence of  
22  
23 128 an anxiety disorder, presence of a depressive disorder or presence of a PTSD).  
24  
25

26 129

27  
28 130 In addition, we checked for the confounding factors observed (including all control variables) and  
29  
30 131 those possibly not measured by the available data. These have been highlighted by including several  
31  
32 132 random effects in the linear prediction. In particular, we checked the presence of heterogeneity of  
33  
34 133 individuals (i.e. variables that were not initially observed, did not change over time and were  
35  
36 134 specific to each person). We also accounted for possible temporal heterogeneity by including a  
37  
38 135 random effect of order (28).  
39  
40

41 136

42  
43  
44 137 The reduced number of cases (i.e. poor SRH, presence of an anxiety disorder, presence of  
45  
46 138 depressive disorder, and presence of PTSD) reduced the statistical power to demonstrate differences  
47  
48 139 between groups. To increase any the statistical power - not increasing the sample size - we increased  
49  
50 140 the level of significance (i.e. alpha), reducing the likelihood of making a Type II error while  
51  
52 141 increasing statistical power. Given the complexity of our model, we preferred to make the inferences  
53  
54  
55  
56  
57

1  
2  
3 142 using a Bayesian conceptual framework. This model allowed us to incorporate several levels of  
4  
5 143 uncertainty in our reported credibility intervals, including model uncertainty, missing data and  
6  
7 144 unobserved confounding. In particular, we used the Integrated Nested Laplace Approach (INLA) in  
8  
9 145 a pure Bayesian conceptual framework (29). Today, in the Bayesian approach two great alternatives  
10  
11 146 can be used to make the Markov chain Monte Carlo (MCMC) and the integrated nested Laplace  
12  
13 147 approximation (INLA) inferences. The latter is both significantly faster and more robust than  
14  
15 148 MCMC and, therefore, has become the most widely used alternative for inference.

16  
17 149 Apart from the odds ratios (OR) and their credibility intervals at 95% (95% ICr), the probability of  
18  
19 150 the parameter estimator (the log(OR) as an absolute value being more than 1 (Prob) is also shown  
20  
21 151 (note that it is unilateral and so does not necessarily have to coincide with the ICr in all the cases).  
22  
23 152 Unlike the p-value in a usual environment, this probability allows us to make inferences about the  
24  
25 153 possible association.

26  
27 154 All analyses were performed with the free software R (version3.5.1) through the INLA approach  
28  
29 155 (28–31).

### 156 *Patient and Public Involvement*

157 No patient involved.

158

## 159 **Results**

160 Table 1 and 2 show descriptive statistics for all variables included. Our sample included mainly  
161 people from Switzerland (n= 4031, 60%), France (n=447, 6.6%), Italy (n=409, 6.1%), Portugal  
162 (n=391, 5.8%), Spain (n=262, 3.9%), and 1191 from all other countries (18%).

163 “Table 1 about here”

164 “Table 2 about here”

1  
2  
3 165 In unadjusted analyses, people born outside Switzerland reported having worse SRH during the  
4  
5 166 second and third CoLaus waves ( $p < 0.001$  for both waves). Nevertheless, in models adjusting for  
6  
7 167 other participant characteristics, we did not find a statistically significant difference for SRH among  
8  
9 168 the migrant and non-migrant populations. This result showed implies that other factors might  
10  
11 169 explain observed differences in SRH.  
12  
13  
14

15 170 “Table 3 about here”  
16  
17

18 171 Table 3 shows that older age groups were more likely to report poor health than younger age groups,  
19  
20 172 with stronger associations among those from certain countries. All individuals aged 55 to 64 years  
21  
22 173 had 44% greater odds (OR = 1.44, 95% Credibility interval, CrI = 0.97-2.15) of reporting poor  
23  
24 174 health than younger populations. Interactions between country of birth and years of residence in  
25  
26 175 Switzerland showed that those born in France and living in Switzerland for 54 years had a 121%  
27  
28 176 higher risk of reporting poor health (OR = 2.21, CrI to 95% = 0.94-5.19) than those born in France  
29  
30 177 and living in Switzerland for 32 years. The same pattern was found among people born in Spain  
31  
32 178 who have lived in Switzerland for 54 years. They were 146% more likely to report health problems  
33  
34 179 (OR = 2.46, 95% CrI = 0.87-6.98) than those born in Spain and living in Switzerland for less than  
35  
36 180 32 years.  
37  
38  
39  
40  
41

42 181 There was a gradient in health status by level of education. The higher the level of education, the  
43  
44 182 better the SRH among both migrant and non-migrant populations. Those with the level of an  
45  
46 183 apprenticeship had 33% less risk (OR = 0.66, 95% CrI = 0.49-0.90) of reporting poor health when  
47  
48 184 compared to those with compulsory education only. Those with a high school education were 37%  
49  
50 185 less likely and those with a higher education level 60% less likely to report poor health (OR = 0.40,  
51  
52  
53  
54  
55  
56  
57  
58  
59  
60

186 95% CrI 0.42) -0.92) than those with compulsory schooling. This is important since 33% of the  
187 migrant population had only a compulsory education compared to 13% of the Swiss born.

188 The monthly household income also showed a gradient in health status. Households with a monthly  
189 gross income between CHF 7,000 and CHF 9,499 had 32% lower odds of reporting poor SRH than  
190 households with incomes below CHF 3,000. Households with a monthly income greater than CHF  
191 13'000 had a 45% lower odds of (OR = 0.55, 95% CrI = 0.28-1.06) describing a poor SRH. This  
192 monthly income gradient was the same for migrant's households. We found significant different  
193 effects for the current profession for both migrant and non-migrant populations. A Swiss born with  
194 a liberal profession had a 62% lower risk of reporting poor SRH (OR = 0.38, 95% CrI = 0.16-0.91)  
195 than a manual labourer; in contrast migrants with a liberal profession the risk of reporting poor  
196 health was greater. Indeed, we found that migrants with a liberal profession (doctor or lawyer) had  
197 152% higher risk of describing a poor SRH (OR = 2.52, CrI to 95% = 0.91 to 6.96) than manual  
198 labourer.

199 Table 4 and table 5, for the group of people born in Switzerland, all categories of civil status had  
200 the same risk of perceiving poor SRH as people living alone. However, childless migrant couples  
201 were 22% less likely (OR = 0.78, 95% CrI = 0.67-0.92) to report poor SRH than those living alone  
202 and migrant couples with children were 34% less likely (OR = 0.66, 95% CrI = 0.55-0.80) of  
203 perceived poor SRH than people living alone. The interaction between country of birth and couple  
204 with children was also statistically significant, and a foreign-born couple with children was at 41%  
205 lower risk of poor SRH health (OR = 0.59, 95% CrI = 0.40-0.87) than people living alone.

206 There was no association between the risk of having a psychiatric illness (major depressive disorder,  
207 generalized anxiety disorder, panic disorder, social phobia, PTSD or agoraphobia) and belonging

208 to the migrant group. Habitual alcohol consumers had 37% less risk of poor SRH (OR = 0.63, 95%  
209 CrI = 0.51-0.78) than non-consumers (p = 0.999) and this pattern was the same for both groups.

210 “Table 4 about here”

211 “Table 5 about here”

## 212 **Discussion**

213 In this study, we focused on the migrant / non-migrant populations of the CoLaus cohort and their  
214 SRH. Scientific literature has shown that a perceived poor SRH is correlated with greater morbidity  
215 and mortality. In addition, studies in other countries have shown that, with regard to SRH, most of  
216 the groups of migrants and ethnic minorities report poorer health than local and non-migrant  
217 populations (6,7,10,11). This was also the case in our unadjusted results.

218 However, in our statistical model with complete adjustment of both measured and unmeasured  
219 confounding factors, we found no statistically significant difference in SRH between those born  
220 outside of Switzerland and in Switzerland. Instead, several SDH and some socio-demographic  
221 characteristics appeared to be stronger explanatory variables for SRH than migrant / non-migrant  
222 status. In particular, there is a gradient for the level of education and for the monthly income,  
223 regardless of the migration status. These gradients are found in other countries, although the strength  
224 of the relationship varies somewhat across countries, for different age groups, by health measures  
225 used, and by sex of collectives (31–33).

226 Regarding mental health diagnoses, migration is often seen as a risk factor contributing to  
227 psychopathology, which may then have an adverse impact on SRH. In this study, however, the risk  
228 of presenting a severe psychiatric illness was not greater among migrants (34–36).



1  
2  
3 229 Finally, in the population born in Switzerland, all categories of civil status had the same risk of  
4  
5 230 reporting poor SRH as people living alone. However, childless migrant couples were less likely to  
6  
7  
8 231 report poor SRH than people living alone, and this risk was even lower for migrant couples with  
9  
10 232 children. This is also reflected in the literature, where migrant women are described as a key player  
11  
12 233 in health - for their health, as well as of their children and their families. Conversely, single migrants  
13  
14 234 were more likely to view their health as poor among both men and women, when compared to those  
15  
16  
17 235 who were married or in a common-law relationship (34–36).  
18  
19

20 236 The strengths of this study were the size of the sample, the rigorous collection of data and the  
21  
22 237 advanced statistical approaches that made it possible to control both measured and unmeasured  
23  
24 238 confounding factors. Among the weaknesses, the predominant migration groups included in this  
25  
26  
27 239 study (from other European countries and often >25 years in Switzerland) may be more similar to  
28  
29 240 those born in Switzerland, limiting the generalizability of these results to other countries with  
30  
31 241 different composition of their migrant populations. The lack of recent migrants in the sample is one  
32  
33 242 of the main limitations of the current study. Another weakness is the likely selection bias in the  
34  
35  
36 243 participants of the study due to the relative low participant rate of 34% of the invited population.  
37  
38 244 We didn't captured the health status at baseline as in many other longitudinal studies of health-  
39  
40 245 selective migration. Finally, the complex modelling used in this study generates large confidence  
41  
42  
43 246 intervals makes it more difficult to exclude a small influence of the country of birth.  
44  
45

46 247

## 48 248 **References**

- 50  
51 249 1. Dinesen C, Nielsen SS, Mortensen LH, Krasnik A. Inequality in self-rated health among  
52 250 immigrants, their descendants and ethnic Danes: examining the role of socioeconomic position.  
53  
54 251 Int J Public Health. 2011 Oct 1;56(5):503–14.  
55  
56  
57  
58  
59  
60

- 252 2. Iglesias E, Robertson E, Johansson S-E, Engfeldt P, Sundquist J. Women, international  
253 migration and self-reported health. A population-based study of women of reproductive age. *Soc*  
254 *Sci Med*. 2003;56(1):111–24.
- 255 3. Lorant V, Van Oyen H, Thomas I. Contextual factors and immigrants' health status:  
256 double jeopardy. *Health Place*. 2008;14(4):678–92.
- 257 4. Reijneveld SA. Reported health, lifestyles, and use of health care of first generation  
258 immigrants in The Netherlands: do socioeconomic factors explain their adverse position? *J*  
259 *Epidemiol Community Health*. 1998;52(5):298–304.
- 260 5. Benyamini Y, Idler EL. Community studies reporting association between self-rated health  
261 and mortality: additional studies, 1995 to 1998. *Res Aging*. 1999;21(3):392–401.
- 262 6. DeSalvo KB, Bloser N, Reynolds K, He J, Muntner P. Mortality prediction with a single  
263 general self-rated health question. *J Gen Intern Med*. 2006;21(3):267.
- 264 7. Idler EL, Benyamini Y. Self-rated health and mortality: a review of twenty-seven  
265 community studies. *J Health Soc Behav*. 1997;21–37.
- 266 8. Jylhä M. What is self-rated health and why does it predict mortality? Towards a unified  
267 conceptual model. *Soc Sci Med*. 2009;69(3):307–16.
- 268 9. Singh Setia M, Lynch J, Abrahamowicz M, Tousignant P, Quesnel-Vallee A. Self-rated  
269 health in Canadian immigrants: Analysis of the Longitudinal Survey of Immigrants to Canada.  
270 *Geogr Care*. 2011 Mar 1;17(2):658–70.
- 271 10. Lindström M, Sundquist J, Östergren P-O. Ethnic differences in self reported health in  
272 Malmö in southern Sweden. *J Epidemiol Community Health*. 2001;55(2):97–103.
- 273 11. Kaplan GA, Goldberg DE, Everson SA, Cohen RD, Salonen R, Tuomilehto J, et al.  
274 Perceived health status and morbidity and mortality: evidence from the Kuopio ischaemic heart  
275 disease risk factor study. *Int J Epidemiol*. 1996;25(2):259–65.
- 276 12. Ismayilova L, Lee HN, Shaw S, El-Bassel N, Gilbert L, Terlikbayeva A, et al. Mental  
277 Health and Migration: Depression, Alcohol Abuse, and Access to Health Care among Migrants in  
278 Central Asia. *J Immigr Minor Health Cent Minor Public Health*. 2014 Dec;16(6):1138–48.
- 279 13. Hutton K, Nyholm M, Nygren JM, Svedberg P. Self-rated mental health and socio-  
280 economic background: a study of adolescents in Sweden. *BMC Public Health*. 2014;14:394–394.
- 281 14. Islam F, Khanlou N, Tamim H. South Asian populations in Canada: migration and mental  
282 health. *BMC Psychiatry*. 2014;14:154–154.

- 1  
2  
3 283 15. Mao Z, Zhao X. The effects of social connections on self-rated physical and mental health  
4 284 among internal migrant and local adolescents in Shanghai, China. *BMC Public Health*.  
5 285 2012;12:97–97.  
6  
7  
8 286 16. Mulki Mölsä, Raija-Leena Punamäki, Samuli I. Saarni, Marja Tiilikainen, Saija Kuittinen,  
9 287 Marja-Liisa Honkasalo. Mental and somatic health and pre- and post-migration factors among  
10 288 older Somali refugees in Finland. *Transcult Psychiatry*. 2014 Mar 19;51(4):499–525.  
11  
12  
13 289 17. Marmot M, Wilkinson RG. *Social determinants of health*. oxford university press New  
14 290 York; 2007.  
15  
16 291 18. Marmot MG, Shipley MJ, Rose G. Inequalities in death—specific explanations of a  
17 292 general pattern? *The Lancet*. 1984;323(8384):1003–6.  
18  
19  
20 293 19. Kawachi I, Daniels N, Robinson DE. Health disparities by race and class: why both matter.  
21 294 *Health Aff (Millwood)*. 2005;24(2):343–52.  
22  
23 295 20. Castañeda H, Holmes SM, Madrigal DS, Young M-ED, Beyeler N, Quesada J.  
24 296 Immigration as a social determinant of health. *Annu Rev Public Health*. 2015;36:375–92.  
25  
26  
27 297 21. Alves L, Azevedo A, Barros H, Vollenweider P, Waeber G, Marques-Vidal P. Prevalence  
28 298 and management of cardiovascular risk factors in Portuguese living in Portugal and Portuguese  
29 299 who migrated to Switzerland. *BMC Public Health*. 2015;15(1):307.  
30  
31 300 22. Marques-Vidal P, Vollenweider P, Waeber G, Paccaud F. Prevalence of overweight and  
32 301 obesity among migrants in Switzerland: association with country of origin. *Public Health Nutr*.  
33 302 2011;14(7):1148–56.  
34  
35  
36 303 23. Loue S. *Assessing Race, Ethnicity and Gender in Health* [Internet]. Springer US; 2006.  
37 304 Available from: <https://books.google.ch/books?id=2MLc1YfMYpkC>  
38  
39  
40 305 24. Eisenstadt SN. *The Absorption of Immigrants: A Comparative Study Based Mainly on the*  
41 306 *Jewish Community in Palestine and the State of Israel* [Internet]. Free Press; 1955. (International  
42 307 library of sociology and social reconstruction). Available from:  
43 308 <https://books.google.ch/books?id=OfBLMQAACA AJ>  
44  
45  
46 309 25. Mangalam J. *Human Migration* [Internet]. 1968 [cited 2018 Feb 9]. Available from:  
47 310 [https://books.google.com/books/about/Human\\_Migration.html?hl=fr&id=CeweBgAAQBAJ](https://books.google.com/books/about/Human_Migration.html?hl=fr&id=CeweBgAAQBAJ)  
48  
49  
50 311 26. Lee ES. A theory of migration. *Demography*. 1966 Mar 1;3(1):47–57.  
51  
52 312 27. Firmann M, Mayor V, Vidal PM, Bochud M, Pécoud A, Hayoz D, et al. The CoLaus  
53 313 study: a population-based study to investigate the epidemiology and genetic determinants of  
54 314 cardiovascular risk factors and metabolic syndrome. *BMC Cardiovasc Disord*. 2008;8(1):6.  
55  
56  
57  
58  
59  
60

- 1  
2  
3 315 28. The R-INLA project. Random walk model of order 1 [Internet]. [cited 2018 Oct 22].  
4 316 Available from: <http://www.math.ntnu.no/inla/r-inla.org/doc/latent/rw1.pdf>  
5  
6  
7 317 29. Rue H, Martino S, Chopin N. Approximate Bayesian inference for latent Gaussian models  
8 318 by using integrated nested Laplace approximations. *J R Stat Soc Ser B Stat Methodol.*  
9 319 2009;71(2):319–92.  
10  
11 320 30. Team RC. R: A language and environment for statistical computing. R Foundation for  
12 321 Statistical Computing, Vienna, Austria. 2013. 2014.  
13  
14  
15 322 31. Arroyo E, Renart G, Saez M. How the economic recession has changed the likelihood of  
16 323 reporting poor self-rated health in Spain. *Int J Equity Health.* 2015;14(1):149.  
17  
18 324 32. Kunst AE, Bos V, Lahelma E, Bartley M, Lissau I, Regidor E, et al. Trends in  
19 325 socioeconomic inequalities in self-assessed health in 10 European countries. *Int J Epidemiol.*  
20 326 2004;34(2):295–305.  
21  
22  
23 327 33. Norman P, Boyle P & Rees P (2005) Selective migration, health and deprivation: a  
24 328 longitudinal analysis. *Social Science & Medicine* 60(12): 2755-2771  
25  
26  
27 329 34. Bodenmann P, Cornuz J, Vaucher P, Ghali W, Daeppen J-B, Favrat B. A health behaviour  
28 330 cross-sectional study of immigrants and non-immigrants in a Swiss urban general-practice setting.  
29 331 *J Immigr Minor Health.* 2010;12(1):24–32.  
30  
31 332 35. Smith JP, Kington R. Demographic and economic correlates of health in old age.  
32 333 *Demography.* 1997;34(1):159–70.  
33  
34  
35 334 36. De Maio FG, Kemp E. The deterioration of health status among immigrants to Canada.  
36 335 *Glob Public Health.* 2010;5(5):462–78.  
37  
38  
39 336

### 337 **Ethics approval and consent to participate**

338 The institutional Ethics Committee of the University of Lausanne, which afterwards became the  
339 Ethics Commission of Canton Vaud ([www.cer-vd.ch](http://www.cer-vd.ch)) approved the first (reference 33/09, decision  
340 of 23rd February 2009) and the second (reference 26/14, decision of 11th March 2014) follow-ups.  
341 The study was performed in agreement with the Helsinki declaration and its former amendments.  
342 All participants gave their signed informed consent before entering the study.  
343

1  
2  
3 344 **Availability of data and materials**  
4

5 345 CoLaus study (<https://www.colaus-psycolaus.ch/>).  
6  
7

8 346  
9

10 347 **Competing interests**  
11

12 348 The authors declare that they have no competing interests  
13  
14

15 349

16  
17 350 **Funding**  
18

19 351 No additional funding was required for this research.  
20  
21

22 352  
23

24 353 **Authors' contributions**  
25

26 354 MP had the research proposal and wrote most of the article. SM made the statistical analyses. SK  
27

28 355 and MP revised the article for important intellectual content. BP and MP have full access to the  
29

30 356 data. BP is the guarantor of the study.  
31  
32

33 357  
34

35 358 **Acknowledgements**  
36

37 359 The CoLaus study was and is supported by research grants from GlaxoSmithKline, the Faculty of  
38

39 360 Biology and Medicine of Lausanne, and the Swiss National Science Foundation (grants 33CSCO-  
40

41 361 122661, 33CS30-139468 and 33CS30-148401). The funding source had no involvement in the  
42

43 362 study design, data collection, analysis and interpretation, writing of the report, or decision to submit  
44

45 363 the article for publication.  
46  
47

48 364  
49

50 365  
51

52 366  
53

54 367  
55  
56  
57

368 **TABLES & FIGURES**

369 Table 1. Descriptive statistics of demographic characteristics and variables for the three periods analyzed  
 370 (2003-2006; 2009-2012; 2014-2017) of the CoLaus study. It should be noted that several variables have  
 371 missing data for one or two waves of CoLaus. This has been taken into account in the context of the  
 372 Bayesian analysis which takes into account the missing values in the treatment of uncertainty.  
 373

|                                                                                             | Period 1 2003-2006<br>(n=6,733) | Period 2 2009-2012<br>(n=5,064) | Period 3 2014-2017<br>(4,881) |
|---------------------------------------------------------------------------------------------|---------------------------------|---------------------------------|-------------------------------|
| Variable                                                                                    | N (%)                           | N (%)                           | N (%)                         |
| <b>Self-reported Health Status</b> (Good or Very Good)                                      | -                               | 4,164 (82%)                     | 3,743 (78%)                   |
| Fair, Poor or Very Poor                                                                     | -                               | 873 (17%)                       | 1,088 (22%)                   |
| <b>Country of birth</b> (Other than Switzerland)                                            | 2,700 (40%)                     | 1,880 (37%)                     | 1,818 (37%)                   |
| <b>Switzerland</b>                                                                          | 4,031 (60%)                     | 3,184 (63%)                     | 3,062 (63%)                   |
| <b>Socio Economical Status</b> quantiles following Hollingshead including relatives (1=<20) | 271 (4%)                        | 130 (3%)                        | -                             |
| 21-39                                                                                       | 658 (10%)                       | 386 (8%)                        | -                             |
| 30-39                                                                                       | 1027 (15%)                      | 781 (15%)                       | -                             |
| 40-54                                                                                       | 982 (15%)                       | 905 (18%)                       | -                             |
| =>55                                                                                        | 781 (12%)                       | 624 (12%)                       | -                             |
| Missing                                                                                     | 3,014 (45%)                     | 2,238 (44%)                     |                               |
| <b>Educational level</b> (Mandatory education)                                              | 1,397 (21%)                     | 878 (17%)                       | 839 (17%)                     |
| Apprenticeship                                                                              | 2,377 (35%)                     | 1,796 (35%)                     | 1,749 (36%)                   |
| High school                                                                                 | 1,625 (24%)                     | 1,306 (26%)                     | 1,258 (26%)                   |
| University education                                                                        | 1,320 (20%)                     | 1,079 (21%)                     | 1,031 (21%)                   |
| <b>Job type</b> (High)                                                                      | 803 (12%)                       | 458 (9%)                        | 476 (11%)                     |
| Middle                                                                                      | 2662 (40%)                      | 1,111 (22%)                     | 714 (16%)                     |
| Low                                                                                         | 1306 (19%)                      | 1,479 (29%)                     | 939 (22%)                     |
| Not working                                                                                 | 1945 (29%)                      | 1,772 (35%)                     | 2,205 (51%)                   |
| <b>Current situation</b> (living alone)                                                     | -                               | 1,414 (28%)                     | 1,286 (30%)                   |
| Single parent family                                                                        | -                               | 285 (6%)                        | 228 (5%)                      |
| Couple without children                                                                     | -                               | 1,757 (35%)                     | 1,508 (35%)                   |
| Couple with children                                                                        | -                               | 1,547 (31%)                     | 1,074 (25%)                   |
| Missing                                                                                     | -                               | 61 (1%)                         | 238 (5%)                      |
| <b>Current professional status</b> (Manoeuvre)                                              | -                               | 207 (4%)                        | 138 (3%)                      |
| Qualified worker                                                                            | -                               | 249 (5%)                        | 194 (4%)                      |
| Farmer                                                                                      | -                               | 7 (0.1%)                        | 8 (0.2%)                      |
| Non qualified employee                                                                      | -                               | 262 (5%)                        | 147 (3%)                      |
| Qualified employee (f.e. secretary)                                                         | -                               | 781 (15%)                       | 543 (11%)                     |
| Low manager                                                                                 | -                               | 789 (16%)                       | 247 (5%)                      |
| Middle manager                                                                              | -                               | 335 (7%)                        | 515 (11%)                     |
| Top manager                                                                                 | -                               | 262 (5%)                        | 363 (7%)                      |

|                                                                    |             |             |             |
|--------------------------------------------------------------------|-------------|-------------|-------------|
| Liberal professional (medical doctor, lawyer)                      | -           | 197 (4%)    | 145 (3%)    |
| Not employed or missing                                            | -           | 1,975 (39%) | 2,581 (53%) |
| <b>Monthly household gross income (&lt;2.999 CHF)</b>              | -           | -           | 253 (6%)    |
| 3000-4999 CHF                                                      | -           | -           | 656 (15%)   |
| 5000-6999 CHF                                                      | -           | -           | 792 (18%)   |
| 7000-9499 CHF                                                      | -           | -           | 715 (17%)   |
| 9500-13000 CHF                                                     | -           | -           | 543 (13%)   |
| > 13000 CHF                                                        | -           | -           | 466 (11%)   |
| Refused or missing                                                 | -           | -           | 909 (21%)   |
| <b>Do you currently drink alcohol (no)</b>                         | 1505 (22%)  | 878 (17%)   | 939 (19%)   |
| Yes                                                                | 5221 (78%)  | 4123 (82%)  | 3,419 (70%) |
| Missing                                                            | 7 (0.1%)    | 63 (1%)     | 523 (11%)   |
| <b>Gender (Man)</b>                                                | 3,189 (47%) | 2,357 (47%) | 2,193 (45%) |
| Women                                                              | 3,544 (53%) | 2,707 (53%) | 2,688 (55%) |
| <b>Age category (0-44 years)</b>                                   | 1,987 (30%) | -           | -           |
| 45-54 years                                                        | 1,967 (29%) | -           | -           |
| 55-64 years                                                        | 1,778 (26%) | -           | -           |
| 65-74 years                                                        | 988 (15%)   | -           | -           |
| > 75 years                                                         | 13 (0.2%)   | -           | -           |
| <b>How many years have you lived in Switzerland (&lt;25 years)</b> | 1,389 (21%) | -           | -           |
| 25-39 years                                                        | 1,274 (19%) | -           | -           |
| 40-48 years                                                        | 1,407 (21%) | -           | -           |
| 49-59 years                                                        | 1,230 (18%) | -           | -           |
| 60-75 years                                                        | 1,284 (19%) | -           | -           |

374  
375 Table 2. Proportions of SHR during waves 2 (2009-2012) and 3 (2014-2017), stratified by place of birth  
376 (non-migrants = born in Switzerland vs. migrants = born in another country) of the CoLaus study. The very  
377 good and good categories (perceived health status) were transformed into a single variable - good health -  
378 and the average, poor and very poor health categories perceived as a second variable - poor health -  
379  
380

| Time period           | Group                   | Self-reported health status |                |              |            |             |
|-----------------------|-------------------------|-----------------------------|----------------|--------------|------------|-------------|
|                       |                         | Very good                   | Good           | Fair         | Poor       | Very poor   |
| Period 2<br>2009-2012 | Born in Switzerland     | 838<br>(26%)                | 1,870<br>(59%) | 416<br>(13%) | 38<br>(1%) | 4<br>(0.1%) |
|                       | Born in another country | 381<br>(20%)                | 1,075<br>(57%) | 362<br>(19%) | 44<br>(2%) | 9<br>(0.5%) |
| Period 3<br>2014-2017 | Born in Switzerland     | 702<br>(23%)                | 1,731<br>(57%) | 537<br>(18%) | 54<br>(2%) | 6<br>(0.2%) |
|                       | Born in another country | 330<br>(18%)                | 979<br>(54%)   | 429<br>(24%) | 56<br>(3%) | 6<br>(0.3%) |

381



1  
2  
3 382  
4 383  
5 384  
6 385  
7 386

Table 3. Results of the mixed models of the explanatory variables for the perceived health of the entire cohort of the CoLaus study for the period 2003-2017.

| <b>Self Rated Health</b>                                                                       | OR (95% Credibility interval) | Prob( log(OR) )>0 |
|------------------------------------------------------------------------------------------------|-------------------------------|-------------------|
| Country of birth (Other than Switzerland)                                                      |                               |                   |
| Switzerland                                                                                    | 1.09(0.52-2.31)               | 0.5932            |
| <b>Socio Economical Status quantiles following Hollingshead including relatives (1=&lt;20)</b> |                               |                   |
| 21-39                                                                                          | 0.92(0.65-1.30)               | 0.6821            |
| 30-39                                                                                          | 1.11(0.81-1.51)               | 0.7439            |
| 40-54                                                                                          | 0.83(0.60-1.14)               | 0.8754            |
| =>55                                                                                           | 0.82(0.55-1.20)               | 0.8479            |
| <b>Educational level (Mandatory education)</b>                                                 |                               |                   |
| Apprenticeship                                                                                 | 0.67(0.49-0.90)               | 0.9960*           |
| High school                                                                                    | 0.63(0.45-0.84)               | 0.9992*           |
| University education                                                                           | 0.40(0.28-0.58)               | 0.9999*           |
| <b>Job type (High)</b>                                                                         |                               |                   |
| Middle                                                                                         | 0.58(0.35-0.95)               | 0.9853*           |
| Low                                                                                            | 0.60(0.41-0.88)               | 0.9958*           |
| Not working                                                                                    | 0.62(0.42-0.92)               | 0.9917*           |
| <b>Current situation (living alone)</b>                                                        |                               |                   |
| Single parent family                                                                           | 1.17(0.78-1.78)               | 0.7758            |
| Couple without children                                                                        | 0.84(0.64-1.09)               | 0.9115            |
| Couple with children                                                                           | 0.89(0.68-1.16)               | 0.8084            |
| <b>Current professional status (manoeuvre)</b>                                                 |                               |                   |
| Qualified worker                                                                               | 0.81(0.45-1.45)               | 0.7646            |
| Farmer                                                                                         | 0.58(0.04-7.49)               | 0.6631            |
| Non-qualified worker (office assistant)                                                        | 1.09(0.70-1.70)               | 0.6530            |
| Qualified employee (f.e. secretary)                                                            | 0.90(0.61-1.32)               | 0.7119            |
| Low manager                                                                                    | 0.94(0.59-1.49)               | 0.6063            |



|                                                                                         |                 |         |
|-----------------------------------------------------------------------------------------|-----------------|---------|
| Middle manager                                                                          | 1.03(0.62-1.69) | 0.5382  |
| Top manager                                                                             | 1.13(0.85-1.51) | 0.7991  |
| <b>Monthly household gross income (&lt; 2.999 CHF)</b>                                  |                 |         |
| 3000-4999 CHF                                                                           | 1.04(0.73-1.47) | 0.5761  |
| 5000-6999 CHF                                                                           | 1.01(0.70-1.46) | 0.5187  |
| 7000-9499 CHF                                                                           | 0.68(0.45-1.02) | 0.9690* |
| 9500-13000 CHF                                                                          | 1.21(0.76-1.92) | 0.7886  |
| > 13000 CHF                                                                             | 0.55(0.29-1.06) | 0.9640* |
| <b>Do you currently drink alcohol (no)</b>                                              |                 |         |
| Yes                                                                                     | 0.63(0.51-0.79) | 0.9999* |
| <b>Gender (Man)</b>                                                                     |                 |         |
| Women                                                                                   | 1.28(1.02-1.60) | 0.9850* |
| <b>Age category (0-45 years)</b>                                                        |                 |         |
| 45-54 years                                                                             | 1.17(0.82-1.68) | 0.8047  |
| 55-64 years                                                                             | 1.44(0.97-2.15) | 0.9643* |
| 65-74 years                                                                             | 1.29(0.82-2.04) | 0.8667  |
| > 75 years                                                                              | 1.17(0.67-2.06) | 0.7130  |
| <b>How many years have you been living in Switzerland (First quintile &lt;32 years)</b> |                 |         |
| Second quintile                                                                         | 0.92(0.72-1.18) | 0.7364  |
| Third quintile                                                                          | 0.92(0.70-1.22) | 0.7108  |
| Fourth quintile                                                                         | 0.93(0.68-1.28) | 0.6691  |
| Fifth quintile                                                                          | 1.03(0.68-1.57) | 0.5552  |

387  
388  
389  
390  
391

Table 4. Results of the mixed models of the explanatory variables for the perceived health of people born in Switzerland of the CoLaus study population of the CoLaus study for the period 2009-2012 and 2014-2017.

| <b>Self Rated Health</b>                                                                       | <b>OR (95% Credibility interval)</b> | <b>Prob( log(OR) )&gt;0</b> |
|------------------------------------------------------------------------------------------------|--------------------------------------|-----------------------------|
| <b>Socio Economical Status quantiles following Hollingshead including relatives (1=&lt;20)</b> |                                      |                             |
| 21-39                                                                                          | 1.04(0.63-1.73)                      | 0.5646                      |
| 30-39                                                                                          | 0.94(0.63-1.39)                      | 0.6305                      |

|                                                        |                  |         |
|--------------------------------------------------------|------------------|---------|
| 40-54                                                  | 1.18(0.78-1.77)  | 0.7817  |
| =>55                                                   | 1.22(0.74-2.03)  | 0.7812  |
| <b>Educational level (Mandatory education)</b>         |                  |         |
| Apprenticeship                                         | 0.97(0.65-1.46)  | 0.5584  |
| High school                                            | 0.97(0.63-1.49)  | 0.5622  |
| University education                                   | 1.15(0.68-1.93)  | 0.6961  |
| <b>Job type (High)</b>                                 |                  |         |
| Middle                                                 | 1.45(0.75-2.78)  | 0.8664  |
| Low                                                    | 1.36(0.82-2.25)  | 0.8807  |
| Not working                                            | 1.30(0.74-2.29)  | 0.8202  |
| <b>Current situation (living alone)</b>                |                  |         |
| Single parent family                                   | 0.82(0.46-1.47)  | 0.7483  |
| Couple without children                                | 0.93(0.67-1.29)  | 0.6620  |
| Couple with children                                   | 0.59(0.40-0.87)  | 0.9965* |
| <b>Current professional status (manoeuvre)</b>         |                  |         |
| Qualified worker                                       | 1.24(0.49-3.13)  | 0.6780  |
| Farmer                                                 | 1.59(0.05-52.74) | 0.6009  |
| Non-qualified worker (office assistant)                | 0.81(0.39-1.66)  | 0.7221  |
| Qualified employe (f.e. secretary)                     | 0.91(0.53-1.57)  | 0.6357  |
| Low manager                                            | 0.97(0.53-1.78)  | 0.5354  |
| Middle manager                                         | 0.62(0.31-1.25)  | 0.9117  |
| Top manager                                            | 0.99(0.69-1.45)  | 0.5033  |
| Liberal professional (medical doctor, lawyer)          | 2.52(0.91-6.96)  | 0.9623  |
| <b>Monthly household gross income (&lt; 2.999 CHF)</b> |                  |         |
| 3000-4999 CHF                                          | 1.30(0.81-2.10)  | 0.8636  |
| 5000-6999 CHF                                          | 1.24(0.78-1.99)  | 0.8177  |
| 7000-9499 CHF                                          | 1.39(0.82-2.37)  | 0.8876  |
| 9500-13000 CHF                                         | 0.92(0.51-1.68)  | 0.6051  |
| > 13000 CHF                                            | 1.24(0.56-2.74)  | 0.7032  |
| <b>Do you currently drink alcohol (no)</b>             |                  |         |
| Yes                                                    | 1.01(0.75-1.34)  | 0.5188  |

|                                  |                 |         |
|----------------------------------|-----------------|---------|
| <b>Gender (Man)</b>              |                 |         |
| Women                            | 0.73(0.55-0.98) | 0.9826* |
| <b>Age category (0-45 years)</b> |                 |         |
| 45-54 years                      | 0.80(0.46-1.40) | 0.7833  |
| 55-64 years                      | 0.62(0.33-1.15) | 0.9363  |
| 65-74 years                      | 0.45(0.22-0.92) | 0.9862* |
| > 75 years                       | 0.75(0.35-1.63) | 0.7673  |

Table 5. Results of the mixed models of the explanatory variables for the perceived health of people born outside of Switzerland of the CoLaus study population of the CoLaus study for the period 2009-2012 and 2014-2017.

| <b>Self Rated Health</b>                                                                       | OR (95% Credibility interval) | Prob( log(OR) )>0 |
|------------------------------------------------------------------------------------------------|-------------------------------|-------------------|
| <b>Socio Economical Status quantiles following Hollingshead including relatives (1=&lt;20)</b> |                               |                   |
| 21-39                                                                                          | 1.04(0.63-1.73)               | 0.5646            |
| 30-39                                                                                          | 0.94(0.63-1.39)               | 0.6305            |
| 40-54                                                                                          | 1.18(0.78-1.77)               | 0.7817            |
| =>55                                                                                           | 1.22(0.74-2.03)               | 0.7812            |
| <b>Educational level (Mandatory education)</b>                                                 |                               |                   |
| Apprenticeship                                                                                 | 0.97(0.65-1.46)               | 0.5584            |
| High school                                                                                    | 0.97(0.63-1.49)               | 0.5622            |
| University education                                                                           | 1.15(0.68-1.93)               | 0.6961            |
| <b>Job type (High)</b>                                                                         |                               |                   |
| Middle                                                                                         | 1.45(0.75-2.78)               | 0.8664            |
| Low                                                                                            | 1.36(0.82-2.25)               | 0.8807            |
| Not working                                                                                    | 1.30(0.74-2.29)               | 0.8202            |
| <b>Current situation (living alone)</b>                                                        |                               |                   |
| Single parent family                                                                           | 0.82(0.46-1.47)               | 0.7483            |
| Couple without children                                                                        | 0.93(0.67-1.29)               | 0.6620            |
| Couple with children                                                                           | 0.59(0.40-0.87)               | 0.9965*           |
| <b>Current professional status (manoeuvre)</b>                                                 |                               |                   |
| Qualified worker                                                                               | 1.24(0.49-3.13)               | 0.6780            |

|                                                        |                  |         |
|--------------------------------------------------------|------------------|---------|
| Farmer                                                 | 1.59(0.05-52.74) | 0.6009  |
| Non-qualified worker (office assistant)                | 0.81(0.39-1.66)  | 0.7221  |
| Qualified employe (f.e. secretary)                     | 0.91(0.53-1.57)  | 0.6357  |
| Low manager                                            | 0.97(0.53-1.78)  | 0.5354  |
| Middle manager                                         | 0.62(0.31-1.25)  | 0.9117  |
| Top manager                                            | 0.99(0.69-1.45)  | 0.5033  |
| Liberal professional (medical doctor, lawyer)          | 2.52(0.91-6.96)  | 0.9623  |
| <b>Monthly household gross income (&lt; 2.999 CHF)</b> |                  |         |
| 3000-4999 CHF                                          | 1.30(0.81-2.10)  | 0.8636  |
| 5000-6999 CHF                                          | 1.24(0.78-1.99)  | 0.8177  |
| 7000-9499 CHF                                          | 1.39(0.82-2.37)  | 0.8876  |
| 9500-13000 CHF                                         | 0.92(0.51-1.68)  | 0.6051  |
| > 13000 CHF                                            | 1.24(0.56-2.74)  | 0.7032  |
| <b>Do you currently drink alcohol (no)</b>             |                  |         |
| Yes                                                    | 1.01(0.75-1.34)  | 0.5188  |
| <b>Gender (Man)</b>                                    |                  |         |
| Women                                                  | 0.73(0.55-0.98)  | 0.9826* |
| <b>Age category (0-45 years)</b>                       |                  |         |
| 45-54 years                                            | 0.80(0.46-1.40)  | 0.7833  |
| 55-64 years                                            | 0.62(0.33-1.15)  | 0.9363  |
| 65-74 years                                            | 0.45(0.22-0.92)  | 0.9862* |
| > 75 years                                             | 0.75(0.35-1.63)  | 0.7673  |

398

399

STROBE Statement—Checklist of items that should be included in reports of *cohort studies*

|                           | Item No | Recommendation                                                                        |
|---------------------------|---------|---------------------------------------------------------------------------------------|
| <b>Title and abstract</b> | 1       | Lines: 1-2<br>Lines: 30-48                                                            |
| <b>Introduction</b>       |         |                                                                                       |
| Background/rationale      | 2       | Lines: 69-85                                                                          |
| Objectives                | 3       | Lines: 87-91                                                                          |
| <b>Methods</b>            |         |                                                                                       |
| Study design              | 4       | Lines: 37-38                                                                          |
| Setting                   | 5       | Lines 94-109                                                                          |
| Participants              | 6       | Lines: 99-103<br>Not applicable                                                       |
| Variables                 | 7       | Lines: 111-124                                                                        |
| Data sources/ measurement | 8*      | Lines: 126-145                                                                        |
| Bias                      | 9       | Lines 139-145                                                                         |
| Study size                | 10      | Lines:147-155                                                                         |
| Quantitative variables    | 11      | Lines:126-145                                                                         |
| Statistical methods       | 12      | Lines 126-162<br>Lines: 139-145<br>Lines: 126-137<br>Lines: 126-162<br>Lines: 147-160 |
| <b>Results</b>            |         |                                                                                       |
| Participants              | 13*     | Lines: 167-169<br>Not Applicable<br>Not Applicable                                    |
| Descriptive data          | 14*     | Lines: 167-169<br>Tables 1 and 2<br>Tables 1 and 2                                    |
| Outcome data              | 15*     | Report numbers of outcome events or summary measures over time                        |
| Main results              | 16      | Lines: 170-211<br>Not Applicable<br>Not Applicable                                    |
| Other analyses            | 17      | Not Applicable                                                                        |
| <b>Discussion</b>         |         |                                                                                       |
| Key results               | 18      | Lines:220-249                                                                         |
| Limitations               | 19      | Lines_245-249                                                                         |
| Interpretation            | 20      | Lines:251-259                                                                         |
| Generalisability          | 21      | Lines:251-259                                                                         |
| <b>Other information</b>  |         |                                                                                       |
| Funding                   | 22      | Line:286                                                                              |

\*Give information separately for exposed and unexposed groups.

**Note:** An Explanation and Elaboration article discusses each checklist item and gives methodological background and published examples of transparent reporting. The STROBE checklist is best used in conjunction with this article (freely available on the Web sites of PLoS Medicine at <http://www.plosmedicine.org/>, Annals of Internal Medicine at <http://www.annals.org/>, and Epidemiology at <http://www.epidem.com/>). Information on the STROBE Initiative is available at <http://www.strobe-statement.org>.

# BMJ Open

## Longitudinal Panel Data Study of Self-Rated health among Migrants in French-speaking Switzerland, 2003-2017

|                                 |                                                                                                                                                                                                                                                                                                                                           |
|---------------------------------|-------------------------------------------------------------------------------------------------------------------------------------------------------------------------------------------------------------------------------------------------------------------------------------------------------------------------------------------|
| Journal:                        | <i>BMJ Open</i>                                                                                                                                                                                                                                                                                                                           |
| Manuscript ID                   | bmjopen-2019-035812.R2                                                                                                                                                                                                                                                                                                                    |
| Article Type:                   | Original research                                                                                                                                                                                                                                                                                                                         |
| Date Submitted by the Author:   | 18-Jun-2020                                                                                                                                                                                                                                                                                                                               |
| Complete List of Authors:       | Mota, Pau; CHUV, Department of Vulnerabilities and Social Medicine<br>Saez, Marc; Universitat de Girona, Research Group on Statistics, Econometrics and Health (GRECS)<br>Selby, Kevin; CHUV, Department the Policlinics<br>Bodenmann, Patrick; CHUV, Department of Vulnerabilities and Social Medicine; CHUV, Department the Policlinics |
| <b>Primary Subject Heading</b>: | Sociology                                                                                                                                                                                                                                                                                                                                 |
| Secondary Subject Heading:      | Public health                                                                                                                                                                                                                                                                                                                             |
| Keywords:                       | SOCIAL MEDICINE, STATISTICS & RESEARCH METHODS, PUBLIC HEALTH                                                                                                                                                                                                                                                                             |
|                                 |                                                                                                                                                                                                                                                                                                                                           |

SCHOLARONE™  
Manuscripts



I, the Submitting Author has the right to grant and does grant on behalf of all authors of the Work (as defined in the below author licence), an exclusive licence and/or a non-exclusive licence for contributions from authors who are: i) UK Crown employees; ii) where BMJ has agreed a CC-BY licence shall apply, and/or iii) in accordance with the terms applicable for US Federal Government officers or employees acting as part of their official duties; on a worldwide, perpetual, irrevocable, royalty-free basis to BMJ Publishing Group Ltd ("BMJ") its licensees and where the relevant Journal is co-owned by BMJ to the co-owners of the Journal, to publish the Work in this journal and any other BMJ products and to exploit all rights, as set out in our [licence](#).

The Submitting Author accepts and understands that any supply made under these terms is made by BMJ to the Submitting Author unless you are acting as an employee on behalf of your employer or a postgraduate student of an affiliated institution which is paying any applicable article publishing charge ("APC") for Open Access articles. Where the Submitting Author wishes to make the Work available on an Open Access basis (and intends to pay the relevant APC), the terms of reuse of such Open Access shall be governed by a Creative Commons licence – details of these licences and which [Creative Commons](#) licence will apply to this Work are set out in our licence referred to above.

Other than as permitted in any relevant BMJ Author's Self Archiving Policies, I confirm this Work has not been accepted for publication elsewhere, is not being considered for publication elsewhere and does not duplicate material already published. I confirm all authors consent to publication of this Work and authorise the granting of this licence.

1  
2  
3 **1 Longitudinal Panel Data Study of Self-Rated health among Migrants**  
4  
5 **2 in French-speaking Switzerland, 2003-2017.**  
6

7 **3 Mota P<sup>1\*</sup>, Saez M<sup>2,3</sup>, Selby K<sup>4</sup>, Bodenmann P.<sup>1,4</sup>**  
8  
9

10 **4**  
11 **5 \* corresponding author:**  
12 **6**

13 **7 Department of Vulnerabilities and Social Medicine,**  
14 **8 University Center for General Medicine and Public Health**  
15 **9 44, Rue du Bugnon. CH – 1011 Lausanne, Switzerland**  
16 **10 Phone: +41787708423**  
17 **11 Email: paumotamoya@gmail.com**  
18 **12**

19  
20  
21 **13 1. Department of Vulnerabilities and Social Medicine, University Center for General Medicine**  
22 **14 and Public Health, Lausanne, Switzerland.**  
23 **15**

24 **16 2. Research Group on Statistics, Econometrics and Health (GRECS), University of**  
25 **17 Girona, Girona, Spain.**

26 **18 3. CIBER of Epidemiology and Public Health (CIBERESP), Madrid, Spain**

27  
28  
29 **19 4. Department of the Polyclinics, University Center for General Medicine and Public Health,**  
30 **20 Lausanne, Switzerland.**  
31  
32

33 **21**  
34  
35 **22 Email addresses:**  
36

37 **23 Mota P: paumotamoya@gmail.com**  
38

39 **24 Saez M: marc.saez@udg.edu**  
40

41 **25 Selby K: kevin.selby@hospvd.ch**  
42

43  
44 **26 Bodenmann P: patrick.bodenmann@hospvd.ch**  
45  
46 **27**  
47  
48  
49  
50  
51  
52  
53  
54  
55  
56  
57  
58  
59  
60



## Abstract

**Introduction:** Studies have documented poorer health among migrants than natives of several European countries, but little is known for Switzerland. We assessed the association between country of birth, socio-economic factors and self-reported health in a prospective cohort of adults living in Lausanne, Switzerland.

**Methods:** We used the data from the Colaus panel data study for three periods: 2003-6 (n=6733), 2009-12 (n=5064) and 2014-17 (n=4555) corresponding to 35% of the source population. The response variable was self-reported health (SRH). Main explanatory variables were socioeconomic status, educational level, professional status, income, gender, age and years in Switzerland. The main covariate was country of birth, dichotomized as born in Switzerland or not. We specified random effects logistic regressions and used Bayesian methods for the inference.

**Results:** Being born outside of Switzerland was not associated with worse SRH (OR 1.09 (95%CI 0.52-2.31)). Several other patient variables were, however, predictive of poor health. Educational level was inversely associated with the risk of reporting poor health. Monthly household income showed a gradient where higher income was associated with lower odds of reporting poor SRH, for both for migrants and non-migrants. Migrant women had lower odds of reporting poor SRH than men (OR=0.73, CI=0.55-0.98). Migrant people living in couple have less risk of reporting poor SRH than people who live alone and the risk is lower for migrant people living in couple with children (OR=0.66, 95% CI=0.55-0.80).

**Conclusions:** Migrant status was not associated with poorer SRH. However, differences in SRH were observed based on gender, age and several social determinants of health.

Total word count: 2147. Number of tables: 4

**Keywords:** migration, self-rated health, social determinants of health, longitudinal study.

## 51 **Article summary**

### 52 *Strengths and limitations of this study*

- 53 • The strengths of this study are the large size of the sample and rigorous collection of data.
- 54 • Among the weaknesses, the predominant migration groups included in this study (from other  
55 European countries and often >25 years in Switzerland) may be more similar to those born  
56 in Switzerland, limiting the generalizability of the results.
- 57 • The lack of recent migrants in the sample is one of the main limitations of the current study.
- 58 • Lack of variables in the original Panel Study focusing on acculturation or experienced  
59 discrimination that which may influence SRH of migrants is another limitation of the study.

## 61 **Introduction**

62 Differences in Self-Rated Health (SRH) between migrants and natives have been documented in  
63 several European countries but not yet in Switzerland (1–4). SRH is a well-established indicator  
64 used in epidemiology and public health research and is an independent predictor of health outcomes  
65 such as morbidity and mortality (5–9). Numerous studies in European countries have reported that  
66 in regard to SRH, most migrant and ethnic minority groups studied appear, on average, to have  
67 lower health status compared with the majority population (6,7,10,11). Moreover, SRH appears to  
68 be associated with patient's mental health (12–16).

69  
70 Alternatively, differences in health status could be attributable to migrants being of lower socio-  
71 economic status than non-migrants, and this key factor must be adequately accounted for when  
72 comparing SRH (17). The scientific evidence of the social determinants of health (SDH) is well-  
73 known (17–19). Socioeconomic status is linked to overall health status not only through the direct

1  
2  
3 74 physical effects of exposure to better or worse material conditions, but also as a result of one's  
4  
5 75 position in the social hierarchy (17,18). The migratory process often creates a period of vulnerability  
6  
7  
8 76 after arrival in the host country, as well as a sharp change in the socio-economic status that has an  
9  
10 77 impact on health condition. Some authors even consider the migratory process as a SDH (20).  
11

12 78  
13  
14 79 Our main objective was to investigate differences in SRH of migrants compared to non-migrants in  
15  
16 80 a representative cohort of Swiss adults followed for 10+ years. We focused on migrants as people  
17  
18 81 born outside Switzerland and we analysed differences on country of birth and the number of years  
19  
20 82 living in Switzerland. We focused on socioeconomic status and the specific characteristics of  
21  
22 83 migrant Cohort patients compared to individuals who reported being born in Switzerland (21–26).  
23  
24  
25

26 84  
27  
28

## 29 85 **Methods**

### 30 86 *Population*

31  
32  
33 87 We used data from the Colaus cohort in Lausanne, Switzerland, and from the PsyCoLaus study, a  
34  
35 88 subsample from the larger CoLaus study focused on mental health. The Colaus cohort is a simple,  
36  
37 89 non-stratified random sample of 19,830 subjects (corresponding to 35% of the source population)  
38  
39 90 invited to participate. The CoLaus cohort is a population-based study designed to assess the  
40  
41 91 prevalence and determinants of cardiovascular risk factors and diseases in Lausanne, a city of  
42  
43 92 145,000 inhabitants of whom 62,000 (43%) were born outside of Switzerland.  
44  
45

46  
47 93 The source population was defined as all subjects aged between 35 and 75 years registered in the  
48  
49 94 population register of the city. The inclusion criteria were to sign the written informed consent and  
50  
51 95 be willing to take part in the study.  
52  
53

54 96 Its aims and sampling strategy have been reported previously (27).  
55  
56  
57

1  
2  
3 97 *Data collected*  
4

5 98 Recruitment was performed between 2003 and 2006 and included 6733 participants. The first  
6  
7 99 follow-up visit was conducted between April 2009 and September 2012 and included 5064  
8  
9  
10 100 participants; the second follow-up was conducted between May 2014 and April 2017 and included  
11  
12 101 4555 participants. The first and second follow-ups included all participants willing to be re-  
13  
14 102 contacted. For this study, data from the baseline study and both follow-up examinations was used.  
15

16  
17 103 *Measurement*  
18

19 104 The response variable is SRH from self reported Likert scale that we transformed into a dichotomic  
20  
21 105 variable. The SRH has been collected since the second period (2009-2012). The following  
22  
23 106 categories: very good and good transformed as a single variable -good health- and categories fair,  
24  
25 107 bad and very bad transformed as a single variable -poor health-. We also considered the mental  
26  
27 108 health as a dependent or response variable through 3 main different indicators (each categorized as  
28  
29 109 present or absent (1 or 0 respectively): Anxiety disorders (General anxiety, trouble panic, social  
30  
31 110 phobia, agoraphobia, other), Depressive disorders (atypical depressive disorder, depressive  
32  
33 111 disorder, other) and the Post-Traumatic Stress Disorder (PTSD). Participants born in other  
34  
35 112 countries, i.e. outside Switzerland, were grouped in a single category (n=1191).  
36  
37  
38  
39

40 113  
41  
42 114 The main explanatory variables were being born outside Switzerland, the country of birth and the  
43  
44 115 years living in Switzerland. We included interactions between being born abroad and the years  
45  
46 116 living in Switzerland with all explanatory variables. The control variables were gender, age, the  
47  
48 117 Socio Economic Status (SES) following the Hollingshead scale, the educational level, job type,  
49  
50 118 current professional status, monthly household gross income and alcohol consumption.  
51  
52  
53

54 119  
55  
56 120 *Statistical analysis*  
57

1  
2  
3 121 We compared individuals by using Student's t-test and the Mann-Whitney U test for quantitative  
4  
5 122 variables and Pearson's chi-square for qualitative variables. For the multivariable analysis, we used  
6  
7  
8 123 a Generalized Linear Mixed Model (GLMM) with binomial response and a logistic link,  
9

10 124

$$12 \quad \log \left( \frac{\text{Pr ob}(Y_{it}=1)}{1 - \text{Pr ob}(Y_{it}=1)} \right) = \eta_{it}$$

17 127

19 128 We included in the linear predictor of each individual in the logistic model, the explanatory  
20  
21 129 variables of interest that could explain the probability of being a case (i.e. poor SRH, presence of  
22  
23  
24 130 an anxiety disorder, presence of a depressive disorder or presence of a PTSD).

26 131

28 132 In addition, we checked for the confounding factors observed (including all control variables) and  
29  
30  
31 133 those possibly not measured by the available data. These have been highlighted by including several  
32  
33 134 random effects in the linear prediction. In particular, we checked the presence of heterogeneity of  
34  
35 135 individuals (i.e. variables that were not initially observed, did not change over time and were  
36  
37  
38 136 specific to each person). We also accounted for possible temporal heterogeneity by including a  
39  
40 137 random effect of order (28).

42 138

44 139 The reduced number of cases (i.e. poor SRH, presence of an anxiety disorder, presence of  
45  
46 140 depressive disorder, and presence of PTSD) reduced the statistical power to demonstrate differences  
47  
48  
49 141 between groups. To increase any the statistical power - not increasing the sample size - we increased  
50  
51 142 the level of significance (i.e. alpha), reducing the likelihood of making a Type II error while  
52  
53  
54 143 increasing statistical power. Given the complexity of our model, we preferred to make the inferences

1  
2  
3 144 using a Bayesian conceptual framework. This model allowed us to incorporate several levels of  
4  
5 145 uncertainty in our reported credibility intervals, including model uncertainty, missing data and  
6  
7 146 unobserved confounding. In particular, we used the Integrated Nested Laplace Approach (INLA) in  
8  
9  
10 147 a pure Bayesian conceptual framework (29). Today, in the Bayesian approach two great alternatives  
11  
12 148 can be used to make the Markov chain Monte Carlo (MCMC) and the integrated nested Laplace  
13  
14 149 approximation (INLA) inferences. The latter is both significantly faster and more robust than  
15  
16  
17 150 MCMC and, therefore, has become the most widely used alternative for inference.

18  
19 151 Apart from the odds ratios (OR) and their credibility intervals at 95% (95% ICr), the probability of  
20  
21 152 the parameter estimator (the log(OR) as an absolute value being more than 1 (Prob) is also shown  
22  
23 153 (note that it is unilateral and so does not necessarily have to coincide with the ICr in all the cases).  
24  
25  
26 154 Unlike the p-value in a usual environment, this probability allows us to make inferences about the  
27  
28 155 possible association.

29  
30  
31 156 All analyses were performed with the free software R (version3.5.1) through the INLA approach  
32  
33 157 (28–31).

### 34 35 158 *Patient and Public Involvement*

36  
37 159 No patient involved.  
38  
39  
40 160

## 41 42 161 **Results**

43  
44 162 Table 1 and 2 show descriptive statistics for all variables included. Our sample included mainly  
45  
46 163 people from Switzerland (n= 4031, 60%), France (n=447, 6.6%), Italy (n=409, 6.1%), Portugal  
47  
48 164 (n=391, 5.8%), Spain (n=262, 3.9%), and 1191 from all other countries (18%).

49  
50  
51  
52 165 “Table 1 about here”  
53  
54

55 166 “Table 2 about here”  
56  
57

1  
2  
3 167 In unadjusted analyses, people born outside Switzerland reported having worse SRH during the  
4  
5 168 second and third CoLaus waves ( $p < 0.001$  for both waves). Nevertheless, in models adjusting for  
6  
7  
8 169 other participant characteristics, we did not find a statistically significant difference for SRH among  
9  
10 170 the migrant and non-migrant populations. This result showed implies that other factors might  
11  
12 171 explain observed differences in SRH.  
13

14  
15 172 “Table 3 about here”  
16  
17

18  
19 173 Table 3 shows that older age groups were more likely to report poor health than younger age groups,  
20  
21 174 with stronger associations among those from certain countries. All individuals aged 55 to 64 years  
22  
23 175 had 44% greater odds (OR = 1.44, 95% Credibility interval, CrI = 0.97-2.15) of reporting poor  
24  
25 176 health than younger populations. Interactions between country of birth and years of residence in  
26  
27  
28 177 Switzerland showed that those born in France and living in Switzerland for 54 years had a 121%  
29  
30 178 higher risk of reporting poor health (OR = 2.21, CrI to 95% = 0.94-5.19) than those born in France  
31  
32 179 and living in Switzerland for 32 years. The same pattern was found among people born in Spain  
33  
34  
35 180 who have lived in Switzerland for 54 years. They were 146% more likely to report health problems  
36  
37 181 (OR = 2.46, 95% CrI = 0.87-6.98) than those born in Spain and living in Switzerland for less than  
38  
39 182 32 years.  
40

41  
42  
43 183 There was a gradient in health status by level of education. The higher the level of education, the  
44  
45 184 better the SRH among both migrant and non-migrant populations. Those with the level of an  
46  
47 185 apprenticeship had 33% less risk (OR = 0.66, 95% CrI = 0.49-0.90) of reporting poor health when  
48  
49 186 compared to those with compulsory education only. Those with a high school education were 37%  
50  
51 187 less likely and those with a higher education level 60% less likely to report poor health (OR = 0.40,  
52  
53  
54  
55  
56  
57  
58  
59  
60

188 95% CrI 0.42) -0.92) than those with compulsory schooling. This is important since 33% of the  
189 migrant population had only a compulsory education compared to 13% of the Swiss born.

190 The monthly household income also showed a gradient in health status. Households with a monthly  
191 gross income between CHF 7,000 and CHF 9,499 had 32% lower odds of reporting poor SRH than  
192 households with incomes below CHF 3,000. Households with a monthly income greater than CHF  
193 13'000 had a 45% lower odds of (OR = 0.55, 95% CrI = 0.28-1.06) describing a poor SRH. This  
194 monthly income gradient was the same for migrant's households. We found significant different  
195 effects for the current profession for both migrant and non-migrant populations. A Swiss born with  
196 a liberal profession had a 62% lower risk of reporting poor SRH (OR = 0.38, 95% CrI = 0.16-0.91)  
197 than a manual labourer; in contrast migrants with a liberal profession the risk of reporting poor  
198 health was greater. Indeed, we found that migrants with a liberal profession (doctor or lawyer) had  
199 152% higher risk of describing a poor SRH (OR = 2.52, CrI to 95% = 0.91 to 6.96) than manual  
200 labourer.

201 Table 4 and table 5, for the group of people born in Switzerland, all categories of civil status had  
202 the same risk of perceiving poor SRH as people living alone. However, childless migrant couples  
203 were 22% less likely (OR = 0.78, 95% CrI = 0.67-0.92) to report poor SRH than those living alone  
204 and migrant couples with children were 34% less likely (OR = 0.66, 95% CrI = 0.55-0.80) of  
205 perceived poor SRH than people living alone. The interaction between country of birth and couple  
206 with children was also statistically significant, and a foreign-born couple with children was at 41%  
207 lower risk of poor SRH health (OR = 0.59, 95% CrI = 0.40-0.87) than people living alone.

208 There was no association between the risk of having a psychiatric illness (major depressive disorder,  
209 generalized anxiety disorder, panic disorder, social phobia, PTSD or agoraphobia) and belonging



1  
2  
3 210 to the migrant group. Habitual alcohol consumers had 37% less risk of poor SRH (OR = 0.63, 95%  
4  
5 211 CrI = 0.51-0.78) than non-consumers (p = 0.999) and this pattern was the same for both groups.  
6  
7

8 212 “Table 4 about here”  
9

10  
11 213 “Table 5 about here”  
12  
13

## 14 214 **Discussion**

15  
16  
17 215 In this study, we focused on the migrant / non-migrant populations of the CoLaus cohort and their  
18  
19 216 SRH. Scientific literature has shown that a perceived poor SRH is correlated with greater morbidity  
20  
21 217 and mortality. In addition, studies in other countries have shown that, with regard to SRH, most of  
22  
23 218 the groups of migrants and ethnic minorities report poorer health than local and non-migrant  
24  
25 219 populations (6,7,10,11). This was also the case in our unadjusted results.  
26  
27

28  
29 220 However, in our statistical model with complete adjustment of both measured and unmeasured  
30  
31 221 confounding factors, we found no statistically significant difference in SRH between those born  
32  
33 222 outside of Switzerland and in Switzerland. Instead, several SDH and some socio-demographic  
34  
35 223 characteristics appeared to be stronger explanatory variables for SRH than migrant / non-migrant  
36  
37 224 status. In particular, there is a gradient for the level of education and for the monthly income,  
38  
39 225 regardless of the migration status. These gradients are found in other countries, although the strength  
40  
41 226 of the relationship varies somewhat across countries, for different age groups, by health measures  
42  
43 227 used, and by sex of collectives (31–33).  
44  
45  
46  
47

48  
49 228 Regarding mental health diagnoses, migration is often seen as a risk factor contributing to  
50  
51 229 psychopathology, which may then have an adverse impact on SRH. In this study, however, the risk  
52  
53 230 of presenting a severe psychiatric illness was not greater among migrants (34–36).  
54  
55  
56  
57

1  
2  
3 231 Finally, in the population born in Switzerland, all categories of civil status had the same risk of  
4  
5 232 reporting poor SRH as people living alone. However, childless migrant couples were less likely to  
6  
7  
8 233 report poor SRH than people living alone, and this risk was even lower for migrant couples with  
9  
10 234 children. This is also reflected in the literature, where migrant women are described as a key player  
11  
12 235 in health - for their health, as well as of their children and their families. Conversely, single migrants  
13  
14 236 were more likely to view their health as poor among both men and women, when compared to those  
15  
16  
17 237 who were married or in a common-law relationship (34–36).  
18  
19

20 238 The strengths of this study were the size of the sample, the rigorous collection of data and the  
21  
22 239 advanced statistical approaches that made it possible to control both measured and unmeasured  
23  
24 240 confounding factors. Among the weaknesses, the predominant migration groups included in this  
25  
26  
27 241 study (from other European countries and often >25 years in Switzerland) may be more similar to  
28  
29 242 those born in Switzerland, limiting the generalizability of these results to other countries with  
30  
31 243 different composition of their migrant populations. The lack of recent migrants in the sample is one  
32  
33  
34 244 of the main limitations of the current study. The variables included in the Panel Data Study are  
35  
36 245 lacking on variables focus on acculturation, intergroup relations or experienced discrimination that  
37  
38 246 which may influence directly or indirectly the relationship between level of education and SRH of  
39  
40  
41 247 migrants. Another weakness is the likely selection bias in the participants of the study due to the  
42  
43 248 relative low participant rate of 34% of the invited population. We did not captured the health status  
44  
45 249 at baseline as in many other longitudinal studies of health-selective migration. Finally, the complex  
46  
47  
48 250 modelling used in this study generates large confidence intervals makes it more difficult to exclude  
49  
50 251 a small influence of the country of birth.  
51  
52

53 252

## 55 253 **References**

- 1  
2  
3 254 1. Dinesen C, Nielsen SS, Mortensen LH, Krasnik A. Inequality in self-rated health among  
4 255 immigrants, their descendants and ethnic Danes: examining the role of socioeconomic position.  
5 256 *Int J Public Health*. 2011 Oct 1;56(5):503–14.
- 6  
7  
8 257 2. Iglesias E, Robertson E, Johansson S-E, Engfeldt P, Sundquist J. Women, international  
9 258 migration and self-reported health. A population-based study of women of reproductive age. *Soc*  
10 259 *Sci Med*. 2003;56(1):111–24.
- 11  
12  
13 260 3. Lorant V, Van Oyen H, Thomas I. Contextual factors and immigrants' health status:  
14 261 double jeopardy. *Health Place*. 2008;14(4):678–92.
- 15  
16 262 4. Reijneveld SA. Reported health, lifestyles, and use of health care of first generation  
17 263 immigrants in The Netherlands: do socioeconomic factors explain their adverse position? *J*  
18 264 *Epidemiol Community Health*. 1998;52(5):298–304.
- 19  
20  
21 265 5. Benyamini Y, Idler EL. Community studies reporting association between self-rated health  
22 266 and mortality: additional studies, 1995 to 1998. *Res Aging*. 1999;21(3):392–401.
- 23  
24  
25 267 6. DeSalvo KB, Bloser N, Reynolds K, He J, Muntner P. Mortality prediction with a single  
26 268 general self-rated health question. *J Gen Intern Med*. 2006;21(3):267.
- 27  
28 269 7. Idler EL, Benyamini Y. Self-rated health and mortality: a review of twenty-seven  
29 270 community studies. *J Health Soc Behav*. 1997;21–37.
- 30  
31 271 8. Jylhä M. What is self-rated health and why does it predict mortality? Towards a unified  
32 272 conceptual model. *Soc Sci Med*. 2009;69(3):307–16.
- 33  
34  
35 273 9. Singh Setia M, Lynch J, Abrahamowicz M, Tousignant P, Quesnel-Vallee A. Self-rated  
36 274 health in Canadian immigrants: Analysis of the Longitudinal Survey of Immigrants to Canada.  
37 275 *Geogr Care*. 2011 Mar 1;17(2):658–70.
- 38  
39  
40 276 10. Lindström M, Sundquist J, Östergren P-O. Ethnic differences in self reported health in  
41 277 Malmö in southern Sweden. *J Epidemiol Community Health*. 2001;55(2):97–103.
- 42  
43 278 11. Kaplan GA, Goldberg DE, Everson SA, Cohen RD, Salonen R, Tuomilehto J, et al.  
44 279 Perceived health status and morbidity and mortality: evidence from the Kuopio ischaemic heart  
45 280 disease risk factor study. *Int J Epidemiol*. 1996;25(2):259–65.
- 46  
47  
48 281 12. Ismayilova L, Lee HN, Shaw S, El-Bassel N, Gilbert L, Terlikbayeva A, et al. Mental  
49 282 Health and Migration: Depression, Alcohol Abuse, and Access to Health Care among Migrants in  
50 283 Central Asia. *J Immigr Minor Health Cent Minor Public Health*. 2014 Dec;16(6):1138–48.
- 51  
52  
53 284 13. Hutton K, Nyholm M, Nygren JM, Svedberg P. Self-rated mental health and socio-  
54 285 economic background: a study of adolescents in Sweden. *BMC Public Health*. 2014;14:394–394.

- 1  
2  
3 286 14. Islam F, Khanlou N, Tamim H. South Asian populations in Canada: migration and mental  
4 287 health. *BMC Psychiatry*. 2014;14:154–154.
- 6  
7 288 15. Mao Z, Zhao X. The effects of social connections on self-rated physical and mental health  
8 289 among internal migrant and local adolescents in Shanghai, China. *BMC Public Health*.  
9 290 2012;12:97–97.
- 11  
12 291 16. Mulki Mölsä, Raija-Leena Punamäki, Samuli I. Saarni, Marja Tiilikainen, Saija Kuittinen,  
13 292 Marja-Liisa Honkasalo. Mental and somatic health and pre- and post-migration factors among  
14 293 older Somali refugees in Finland. *Transcult Psychiatry*. 2014 Mar 19;51(4):499–525.
- 16  
17 294 17. Marmot M, Wilkinson RG. Social determinants of health. oxford university press New  
18 295 York; 2007.
- 19  
20 296 18. Marmot MG, Shipley MJ, Rose G. Inequalities in death—specific explanations of a  
21 297 general pattern? *The Lancet*. 1984;323(8384):1003–6.
- 23  
24 298 19. Kawachi I, Daniels N, Robinson DE. Health disparities by race and class: why both matter.  
25 299 *Health Aff (Millwood)*. 2005;24(2):343–52.
- 26  
27 300 20. Castañeda H, Holmes SM, Madrigal DS, Young M-ED, Beyeler N, Quesada J.  
28 301 Immigration as a social determinant of health. *Annu Rev Public Health*. 2015;36:375–92.
- 30  
31 302 21. Alves L, Azevedo A, Barros H, Vollenweider P, Waeber G, Marques-Vidal P. Prevalence  
32 303 and management of cardiovascular risk factors in Portuguese living in Portugal and Portuguese  
33 304 who migrated to Switzerland. *BMC Public Health*. 2015;15(1):307.
- 34  
35 305 22. Marques-Vidal P, Vollenweider P, Waeber G, Paccaud F. Prevalence of overweight and  
36 306 obesity among migrants in Switzerland: association with country of origin. *Public Health Nutr*.  
37 307 2011;14(7):1148–56.
- 39  
40 308 23. Loue S. *Assessing Race, Ethnicity and Gender in Health* [Internet]. Springer US; 2006.  
41 309 Available from: <https://books.google.ch/books?id=2MLc1YfMYpkC>
- 43  
44 310 24. Eisenstadt SN. *The Absorption of Immigrants: A Comparative Study Based Mainly on the*  
45 311 *Jewish Community in Palestine and the State of Israel* [Internet]. Free Press; 1955. (International  
46 312 library of sociology and social reconstruction). Available from:  
47 313 <https://books.google.ch/books?id=OfBLMQAACAAJ>
- 49  
50 314 25. Mangalam J. *Human Migration* [Internet]. 1968 [cited 2018 Feb 9]. Available from:  
51 315 [https://books.google.com/books/about/Human\\_Migration.html?hl=fr&id=CeweBgAAQBAJ](https://books.google.com/books/about/Human_Migration.html?hl=fr&id=CeweBgAAQBAJ)
- 52  
53 316 26. Lee ES. A theory of migration. *Demography*. 1966 Mar 1;3(1):47–57.
- 54  
55  
56  
57  
58  
59  
60

- 1  
2  
3 317 27. Firmann M, Mayor V, Vidal PM, Bochud M, Pécoud A, Hayoz D, et al. The CoLaus  
4 318 study: a population-based study to investigate the epidemiology and genetic determinants of  
5 319 cardiovascular risk factors and metabolic syndrome. *BMC Cardiovasc Disord.* 2008;8(1):6.  
6  
7  
8 320 28. The R-INLA project. Random walk model of order 1 [Internet]. [cited 2018 Oct 22].  
9 321 Available from: [http://www.math.ntnu.no/inla/r-](http://www.math.ntnu.no/inla/r-inla.org/doc/latent/rw1.pdf)  
10  
11 322 29. Rue H, Martino S, Chopin N. Approximate Bayesian inference for latent Gaussian models  
12 323 by using integrated nested Laplace approximations. *J R Stat Soc Ser B Stat Methodol.*  
13 324 2009;71(2):319–92.  
14  
15  
16 325 30. Team RC. R: A language and environment for statistical computing. R Foundation for  
17 326 Statistical Computing, Vienna, Austria. 2013. 2014.  
18  
19  
20 327 31. Arroyo E, Renart G, Saez M. How the economic recession has changed the likelihood of  
21 328 reporting poor self-rated health in Spain. *Int J Equity Health.* 2015;14(1):149.  
22  
23 329 32. Kunst AE, Bos V, Lahelma E, Bartley M, Lissau I, Regidor E, et al. Trends in  
24 330 socioeconomic inequalities in self-assessed health in 10 European countries. *Int J Epidemiol.*  
25 331 2004;34(2):295–305.  
26  
27  
28 332 33. Norman P, Boyle P & Rees P (2005) Selective migration, health and deprivation: a  
29 333 longitudinal analysis. *Social Science & Medicine* 60(12): 2755-2771  
30  
31 334 34. Bodenmann P, Cornuz J, Vaucher P, Ghali W, Daepfen J-B, Favrat B. A health behaviour  
32 335 cross-sectional study of immigrants and non-immigrants in a Swiss urban general-practice setting.  
33 336 *J Immigr Minor Health.* 2010;12(1):24–32.  
34  
35  
36 337 35. Smith JP, Kington R. Demographic and economic correlates of health in old age.  
37 338 *Demography.* 1997;34(1):159–70.  
38  
39  
40 339 36. De Maio FG, Kemp E. The deterioration of health status among immigrants to Canada.  
41 340 *Glob Public Health.* 2010;5(5):462–78.  
42  
43  
44 341

#### 342 **Ethics approval and consent to participate**

343 The institutional Ethics Committee of the University of Lausanne, which afterwards became the  
344 Ethics Commission of Canton Vaud ([www.cer-vd.ch](http://www.cer-vd.ch)) approved the first (reference 33/09, decision  
345 of 23rd February 2009) and the second (reference 26/14, decision of 11th March 2014) follow-ups.

1  
2  
3 346 The study was performed in agreement with the Helsinki declaration and its former amendments.  
4

5 347 All participants gave their signed informed consent before entering the study.  
6  
7

8 348  
9

### 10 349 **Availability of data and materials**

11  
12 350 CoLaus study (<https://www.colaus-psycholaus.ch/>).  
13  
14

15 351

### 16 17 352 **Competing interests**

18  
19 353 The authors declare that they have no competing interests  
20  
21

22 354

### 23 24 355 **Funding**

25  
26 356 No additional funding was required for this research.  
27  
28

29 357

### 30 31 358 **Authors' contributions**

32  
33 359 MP had the research proposal and wrote most of the article. SM made the statistical analyses. SK  
34

35 360 and MP revised the article for important intellectual content. BP and MP have full access to the  
36

37 361 data. BP is the guarantor of the study.  
38  
39

40 362

### 41 42 363 **Acknowledgements**

43  
44 364 The CoLaus study was and is supported by research grants from GlaxoSmithKline, the Faculty of  
45

46 365 Biology and Medicine of Lausanne, and the Swiss National Science Foundation (grants 33CSCO-  
47

48 366 122661, 33CS30-139468 and 33CS30-148401). The funding source had no involvement in the  
49

50 367 study design, data collection, analysis and interpretation, writing of the report, or decision to submit  
51

52 368 the article for publication.  
53  
54

55  
56 369  
57

370

371

372

373 **TABLES & FIGURES**

374 Table 1. Descriptive statistics of demographic characteristics and variables for the three periods analyzed  
 375 (2003-2006; 2009-2012; 2014-2017) of the CoLaus study. It should be noted that several variables have  
 376 missing data for one or two waves of CoLaus. This has been taken into account in the context of the  
 377 Bayesian analysis which takes into account the missing values in the treatment of uncertainty.  
 378

|                                                                                             | Period 1 2003-2006<br>(n=6,733) | Period 2 2009-2012<br>(n=5,064) | Period 3 2014-2017<br>(4,881) |
|---------------------------------------------------------------------------------------------|---------------------------------|---------------------------------|-------------------------------|
| Variable                                                                                    | N (%)                           | N (%)                           | N (%)                         |
| <b>Self-reported Health Status</b> (Good or Very Good)                                      | -                               | 4,164 (82%)                     | 3,743 (78%)                   |
| Fair, Poor or Very Poor                                                                     | -                               | 873 (17%)                       | 1,088 (22%)                   |
| <b>Country of birth (Other than Switzerland)</b>                                            | 2,700 (40%)                     | 1,880 (37%)                     | 1,818 (37%)                   |
| <b>Switzerland</b>                                                                          | 4,031 (60%)                     | 3,184 (63%)                     | 3,062 (63%)                   |
| <b>Socio Economical Status</b> quantiles following Hollingshead including relatives (1=<20) | 271 (4%)                        | 130 (3%)                        | -                             |
| 21-39                                                                                       | 658 (10%)                       | 386 (8%)                        | -                             |
| 30-39                                                                                       | 1027 (15%)                      | 781 (15%)                       | -                             |
| 40-54                                                                                       | 982 (15%)                       | 905 (18%)                       | -                             |
| =>55                                                                                        | 781 (12%)                       | 624 (12%)                       | -                             |
| Missing                                                                                     | 3,014 (45%)                     | 2,238 (44%)                     |                               |
| <b>Educational level</b> (Mandatory education)                                              | 1,397 (21%)                     | 878 (17%)                       | 839 (17%)                     |
| Apprenticeship                                                                              | 2,377 (35%)                     | 1,796 (35%)                     | 1,749 (36%)                   |
| High school                                                                                 | 1,625 (24%)                     | 1,306 (26%)                     | 1,258 (26%)                   |
| University education                                                                        | 1,320 (20%)                     | 1,079 (21%)                     | 1,031 (21%)                   |
| <b>Job type</b> (High)                                                                      | 803 (12%)                       | 458 (9%)                        | 476 (11%)                     |
| Middle                                                                                      | 2662 (40%)                      | 1,111 (22%)                     | 714 (16%)                     |
| Low                                                                                         | 1306 (19%)                      | 1,479 (29%)                     | 939 (22%)                     |
| Not working                                                                                 | 1945 (29%)                      | 1,772 (35%)                     | 2,205 (51%)                   |
| <b>Current situation</b> (living alone)                                                     | -                               | 1,414 (28%)                     | 1,286 (30%)                   |
| Single parent family                                                                        | -                               | 285 (6%)                        | 228 (5%)                      |
| Couple without children                                                                     | -                               | 1,757 (35%)                     | 1,508 (35%)                   |
| Couple with children                                                                        | -                               | 1,547 (31%)                     | 1,074 (25%)                   |
| Missing                                                                                     | -                               | 61 (1%)                         | 238 (5%)                      |
| <b>Current professional status</b> (Manoeuvre)                                              | -                               | 207 (4%)                        | 138 (3%)                      |
| Qualified worker                                                                            | -                               | 249 (5%)                        | 194 (4%)                      |
| Farmer                                                                                      | -                               | 7 (0.1%)                        | 8 (0.2%)                      |



|                                                                    |             |             |             |
|--------------------------------------------------------------------|-------------|-------------|-------------|
| Non qualified employee                                             | -           | 262 (5%)    | 147 (3%)    |
| Qualified employee (f.e. secretary)                                | -           | 781 (15%)   | 543 (11%)   |
| Low manager                                                        | -           | 789 (16%)   | 247 (5%)    |
| Middle manager                                                     | -           | 335 (7%)    | 515 (11%)   |
| Top manager                                                        | -           | 262 (5%)    | 363 (7%)    |
| Liberal professional (medical doctor, lawyer)                      | -           | 197 (4%)    | 145 (3%)    |
| Not employed or missing                                            | -           | 1,975 (39%) | 2,581 (53%) |
| <b>Monthly household gross income (&lt;2.999 CHF)</b>              | -           | -           | 253 (6%)    |
| 3000-4999 CHF                                                      | -           | -           | 656 (15%)   |
| 5000-6999 CHF                                                      | -           | -           | 792 (18%)   |
| 7000-9499 CHF                                                      | -           | -           | 715 (17%)   |
| 9500-13000 CHF                                                     | -           | -           | 543 (13%)   |
| > 13000 CHF                                                        | -           | -           | 466 (11%)   |
| Refused or missing                                                 | -           | -           | 909 (21%)   |
| <b>Do you currently drink alcohol (no)</b>                         | 1505 (22%)  | 878 (17%)   | 939 (19%)   |
| Yes                                                                | 5221 (78%)  | 4123 (82%)  | 3,419 (70%) |
| Missing                                                            | 7 (0.1%)    | 63 (1%)     | 523 (11%)   |
| <b>Gender (Man)</b>                                                | 3,189 (47%) | 2,357 (47%) | 2,193 (45%) |
| Women                                                              | 3,544 (53%) | 2,707 (53%) | 2,688 (55%) |
| <b>Age category (0-44 years)</b>                                   | 1,987 (30%) | -           | -           |
| 45-54 years                                                        | 1,967 (29%) | -           | -           |
| 55-64 years                                                        | 1,778 (26%) | -           | -           |
| 65-74 years                                                        | 988 (15%)   | -           | -           |
| > 75 years                                                         | 13 (0.2%)   | -           | -           |
| <b>How many years have you lived in Switzerland (&lt;25 years)</b> | 1,389 (21%) | -           | -           |
| 25-39 years                                                        | 1,274 (19%) | -           | -           |
| 40-48 years                                                        | 1,407 (21%) | -           | -           |
| 49-59 years                                                        | 1,230 (18%) | -           | -           |
| 60-75 years                                                        | 1,284 (19%) | -           | -           |

379  
380 Table 2. Proportions of SHR during waves 2 (2009-2012) and 3 (2014-2017), stratified by place of birth  
381 (non-migrants = born in Switzerland vs. migrants = born in another country) of the CoLaus study. The very  
382 good and good categories (perceived health status) were transformed into a single variable - good health -  
383 and the average, poor and very poor health categories perceived as a second variable - poor health -  
384  
385

| Time period | Group               | Self-reported health status |             |           |         |           |
|-------------|---------------------|-----------------------------|-------------|-----------|---------|-----------|
|             |                     | Very good                   | Good        | Fair      | Poor    | Very poor |
| Period 2    | Born in Switzerland | 838 (26%)                   | 1,870 (59%) | 416 (13%) | 38 (1%) | 4 (0.1%)  |



|                       |                         |              |                |              |            |             |
|-----------------------|-------------------------|--------------|----------------|--------------|------------|-------------|
| 2009-2012             | Born in another country | 381<br>(20%) | 1,075<br>(57%) | 362<br>(19%) | 44<br>(2%) | 9<br>(0.5%) |
| Period 3<br>2014-2017 | Born in Switzerland     | 702<br>(23%) | 1,731<br>(57%) | 537<br>(18%) | 54<br>(2%) | 6<br>(0.2%) |
|                       | Born in another country | 330<br>(18%) | 979<br>(54%)   | 429<br>(24%) | 56<br>(3%) | 6<br>(0.3%) |

Table 3. Results of the mixed models of the explanatory variables for the perceived health of the entire cohort of the CoLaus study for the period 2003-2017.

| <b>Self Rated Health</b>                                                                       | OR (95% Credibility interval) | Prob( log(OR) >0) |
|------------------------------------------------------------------------------------------------|-------------------------------|-------------------|
| Country of birth (Other than Switzerland)                                                      |                               |                   |
| Switzerland                                                                                    | 1.09(0.52-2.31)               | 0.5932            |
| <b>Socio Economical Status quantiles following Hollingshead including relatives (1=&lt;20)</b> |                               |                   |
| 21-39                                                                                          | 0.92(0.65-1.30)               | 0.6821            |
| 30-39                                                                                          | 1.11(0.81-1.51)               | 0.7439            |
| 40-54                                                                                          | 0.83(0.60-1.14)               | 0.8754            |
| =>55                                                                                           | 0.82(0.55-1.20)               | 0.8479            |
| <b>Educational level (Mandatory education)</b>                                                 |                               |                   |
| Apprenticeship                                                                                 | 0.67(0.49-0.90)               | 0.9960*           |
| High school                                                                                    | 0.63(0.45-0.84)               | 0.9992*           |
| University education                                                                           | 0.40(0.28-0.58)               | 0.9999*           |
| <b>Job type (High)</b>                                                                         |                               |                   |
| Middle                                                                                         | 0.58(0.35-0.95)               | 0.9853*           |
| Low                                                                                            | 0.60(0.41-0.88)               | 0.9958*           |
| Not working                                                                                    | 0.62(0.42-0.92)               | 0.9917*           |
| <b>Current situation (living alone)</b>                                                        |                               |                   |
| Single parent family                                                                           | 1.17(0.78-1.78)               | 0.7758            |
| Couple without children                                                                        | 0.84(0.64-1.09)               | 0.9115            |
| Couple with children                                                                           | 0.89(0.68-1.16)               | 0.8084            |
| <b>Current professional status (manoeuvre)</b>                                                 |                               |                   |

|                                                                                         |                 |         |
|-----------------------------------------------------------------------------------------|-----------------|---------|
| Qualified worker                                                                        | 0.81(0.45-1.45) | 0.7646  |
| Farmer                                                                                  | 0.58(0.04-7.49) | 0.6631  |
| Non-qualified worker (office assistant)                                                 | 1.09(0.70-1.70) | 0.6530  |
| Qualified employee (f.e. secretary)                                                     | 0.90(0.61-1.32) | 0.7119  |
| Low manager                                                                             | 0.94(0.59-1.49) | 0.6063  |
| Middle manager                                                                          | 1.03(0.62-1.69) | 0.5382  |
| Top manager                                                                             | 1.13(0.85-1.51) | 0.7991  |
| <b>Monthly household gross income (&lt; 2.999 CHF)</b>                                  |                 |         |
| 3000-4999 CHF                                                                           | 1.04(0.73-1.47) | 0.5761  |
| 5000-6999 CHF                                                                           | 1.01(0.70-1.46) | 0.5187  |
| 7000-9499 CHF                                                                           | 0.68(0.45-1.02) | 0.9690* |
| 9500-13000 CHF                                                                          | 1.21(0.76-1.92) | 0.7886  |
| > 13000 CHF                                                                             | 0.55(0.29-1.06) | 0.9640* |
| <b>Do you currently drink alcohol (no)</b>                                              |                 |         |
| Yes                                                                                     | 0.63(0.51-0.79) | 0.9999* |
| <b>Gender (Man)</b>                                                                     |                 |         |
| Women                                                                                   | 1.28(1.02-1.60) | 0.9850* |
| <b>Age category (0-45 years)</b>                                                        |                 |         |
| 45-54 years                                                                             | 1.17(0.82-1.68) | 0.8047  |
| 55-64 years                                                                             | 1.44(0.97-2.15) | 0.9643* |
| 65-74 years                                                                             | 1.29(0.82-2.04) | 0.8667  |
| > 75 years                                                                              | 1.17(0.67-2.06) | 0.7130  |
| <b>How many years have you been living in Switzerland (First quintile &lt;32 years)</b> |                 |         |
| Second quintile                                                                         | 0.92(0.72-1.18) | 0.7364  |
| Third quintile                                                                          | 0.92(0.70-1.22) | 0.7108  |
| Fourth quintile                                                                         | 0.93(0.68-1.28) | 0.6691  |
| Fifth quintile                                                                          | 1.03(0.68-1.57) | 0.5552  |

Table 4. Results of the mixed models of the explanatory variables for the perceived health of people born in Switzerland of the CoLaus study population of the CoLaus study for the period 2009-2012 and 2014-2017.

| <b>Self Rated Health</b>                                                                       | OR (95% Credibility interval) | Prob( log(OR) )>0 |
|------------------------------------------------------------------------------------------------|-------------------------------|-------------------|
| <b>Socio Economical Status quantiles following Hollingshead including relatives (1=&lt;20)</b> |                               |                   |
| 21-39                                                                                          | 1.04(0.63-1.73)               | 0.5646            |
| 30-39                                                                                          | 0.94(0.63-1.39)               | 0.6305            |
| 40-54                                                                                          | 1.18(0.78-1.77)               | 0.7817            |
| =>55                                                                                           | 1.22(0.74-2.03)               | 0.7812            |
| <b>Educational level (Mandatory education)</b>                                                 |                               |                   |
| Apprenticeship                                                                                 | 0.97(0.65-1.46)               | 0.5584            |
| High school                                                                                    | 0.97(0.63-1.49)               | 0.5622            |
| University education                                                                           | 1.15(0.68-1.93)               | 0.6961            |
| <b>Job type (High)</b>                                                                         |                               |                   |
| Middle                                                                                         | 1.45(0.75-2.78)               | 0.8664            |
| Low                                                                                            | 1.36(0.82-2.25)               | 0.8807            |
| Not working                                                                                    | 1.30(0.74-2.29)               | 0.8202            |
| <b>Current situation (living alone)</b>                                                        |                               |                   |
| Single parent family                                                                           | 0.82(0.46-1.47)               | 0.7483            |
| Couple without children                                                                        | 0.93(0.67-1.29)               | 0.6620            |
| Couple with children                                                                           | 0.59(0.40-0.87)               | 0.9965*           |
| <b>Current professional status (manoeuvre)</b>                                                 |                               |                   |
| Qualified worker                                                                               | 1.24(0.49-3.13)               | 0.6780            |
| Farmer                                                                                         | 1.59(0.05-52.74)              | 0.6009            |
| Non-qualified worker (office assistant)                                                        | 0.81(0.39-1.66)               | 0.7221            |
| Qualified employe (f.e. secretary)                                                             | 0.91(0.53-1.57)               | 0.6357            |
| Low manager                                                                                    | 0.97(0.53-1.78)               | 0.5354            |
| Middle manager                                                                                 | 0.62(0.31-1.25)               | 0.9117            |
| Top manager                                                                                    | 0.99(0.69-1.45)               | 0.5033            |
| Liberal professional (medical doctor, lawyer)                                                  | 2.52(0.91-6.96)               | 0.9623            |
| <b>Monthly household gross income (&lt; 2.999 CHF)</b>                                         |                               |                   |
| 3000-4999 CHF                                                                                  | 1.30(0.81-2.10)               | 0.8636            |
| 5000-6999 CHF                                                                                  | 1.24(0.78-1.99)               | 0.8177            |

|                                            |                 |         |
|--------------------------------------------|-----------------|---------|
| 7000-9499 CHF                              | 1.39(0.82-2.37) | 0.8876  |
| 9500-13000 CHF                             | 0.92(0.51-1.68) | 0.6051  |
| > 13000 CHF                                | 1.24(0.56-2.74) | 0.7032  |
| <b>Do you currently drink alcohol (no)</b> |                 |         |
| Yes                                        | 1.01(0.75-1.34) | 0.5188  |
| <b>Gender (Man)</b>                        |                 |         |
| Women                                      | 0.73(0.55-0.98) | 0.9826* |
| <b>Age category (0-45 years)</b>           |                 |         |
| 45-54 years                                | 0.80(0.46-1.40) | 0.7833  |
| 55-64 years                                | 0.62(0.33-1.15) | 0.9363  |
| 65-74 years                                | 0.45(0.22-0.92) | 0.9862* |
| > 75 years                                 | 0.75(0.35-1.63) | 0.7673  |

397  
398  
399  
400  
401  
402

Table 5. Results of the mixed models of the explanatory variables for the perceived health of people born outside of Switzerland of the CoLaus study population of the CoLaus study for the period 2009-2012 and 2014-2017.

| <b>Self Rated Health</b>                                                                       | OR (95% Credibility interval) | Prob( log(OR) )>0 |
|------------------------------------------------------------------------------------------------|-------------------------------|-------------------|
| <b>Socio Economical Status quantiles following Hollingshead including relatives (1=&lt;20)</b> |                               |                   |
| 21-39                                                                                          | 1.04(0.63-1.73)               | 0.5646            |
| 30-39                                                                                          | 0.94(0.63-1.39)               | 0.6305            |
| 40-54                                                                                          | 1.18(0.78-1.77)               | 0.7817            |
| =>55                                                                                           | 1.22(0.74-2.03)               | 0.7812            |
| <b>Educational level (Mandatory education)</b>                                                 |                               |                   |
| Apprenticeship                                                                                 | 0.97(0.65-1.46)               | 0.5584            |
| High school                                                                                    | 0.97(0.63-1.49)               | 0.5622            |
| University education                                                                           | 1.15(0.68-1.93)               | 0.6961            |
| <b>Job type (High)</b>                                                                         |                               |                   |
| Middle                                                                                         | 1.45(0.75-2.78)               | 0.8664            |
| Low                                                                                            | 1.36(0.82-2.25)               | 0.8807            |
| Not working                                                                                    | 1.30(0.74-2.29)               | 0.8202            |
| <b>Current situation (living alone)</b>                                                        |                               |                   |

|                                                        |                  |         |
|--------------------------------------------------------|------------------|---------|
| Single parent family                                   | 0.82(0.46-1.47)  | 0.7483  |
| Couple without children                                | 0.93(0.67-1.29)  | 0.6620  |
| Couple with children                                   | 0.59(0.40-0.87)  | 0.9965* |
| <b>Current professional status (manoeuvre)</b>         |                  |         |
| Qualified worker                                       | 1.24(0.49-3.13)  | 0.6780  |
| Farmer                                                 | 1.59(0.05-52.74) | 0.6009  |
| Non-qualified worker (office assistant)                | 0.81(0.39-1.66)  | 0.7221  |
| Qualified employe (f.e. secretary)                     | 0.91(0.53-1.57)  | 0.6357  |
| Low manager                                            | 0.97(0.53-1.78)  | 0.5354  |
| Middle manager                                         | 0.62(0.31-1.25)  | 0.9117  |
| Top manager                                            | 0.99(0.69-1.45)  | 0.5033  |
| Liberal professional (medical doctor, lawyer)          | 2.52(0.91-6.96)  | 0.9623  |
| <b>Monthly household gross income (&lt; 2.999 CHF)</b> |                  |         |
| 3000-4999 CHF                                          | 1.30(0.81-2.10)  | 0.8636  |
| 5000-6999 CHF                                          | 1.24(0.78-1.99)  | 0.8177  |
| 7000-9499 CHF                                          | 1.39(0.82-2.37)  | 0.8876  |
| 9500-13000 CHF                                         | 0.92(0.51-1.68)  | 0.6051  |
| > 13000 CHF                                            | 1.24(0.56-2.74)  | 0.7032  |
| <b>Do you currently drink alcohol (no)</b>             |                  |         |
| Yes                                                    | 1.01(0.75-1.34)  | 0.5188  |
| <b>Gender (Man)</b>                                    |                  |         |
| Women                                                  | 0.73(0.55-0.98)  | 0.9826* |
| <b>Age category (0-45 years)</b>                       |                  |         |
| 45-54 years                                            | 0.80(0.46-1.40)  | 0.7833  |
| 55-64 years                                            | 0.62(0.33-1.15)  | 0.9363  |
| 65-74 years                                            | 0.45(0.22-0.92)  | 0.9862* |
| > 75 years                                             | 0.75(0.35-1.63)  | 0.7673  |

403

404

STROBE Statement—Checklist of items that should be included in reports of *cohort studies*

|                           | Item No | Recommendation                                                                        |
|---------------------------|---------|---------------------------------------------------------------------------------------|
| <b>Title and abstract</b> | 1       | Lines: 1-2<br>Lines: 30-48                                                            |
| <b>Introduction</b>       |         |                                                                                       |
| Background/rationale      | 2       | Lines: 69-85                                                                          |
| Objectives                | 3       | Lines: 87-91                                                                          |
| <b>Methods</b>            |         |                                                                                       |
| Study design              | 4       | Lines: 37-38                                                                          |
| Setting                   | 5       | Lines 94-109                                                                          |
| Participants              | 6       | Lines: 99-103<br>Not applicable                                                       |
| Variables                 | 7       | Lines: 111-124                                                                        |
| Data sources/ measurement | 8*      | Lines: 126-145                                                                        |
| Bias                      | 9       | Lines 139-145                                                                         |
| Study size                | 10      | Lines:147-155                                                                         |
| Quantitative variables    | 11      | Lines:126-145                                                                         |
| Statistical methods       | 12      | Lines 126-162<br>Lines: 139-145<br>Lines: 126-137<br>Lines: 126-162<br>Lines: 147-160 |
| <b>Results</b>            |         |                                                                                       |
| Participants              | 13*     | Lines: 167-169<br>Not Applicable<br>Not Applicable                                    |
| Descriptive data          | 14*     | Lines: 167-169<br>Tables 1 and 2<br>Tables 1 and 2                                    |
| Outcome data              | 15*     | Report numbers of outcome events or summary measures over time                        |
| Main results              | 16      | Lines: 170-211<br>Not Applicable<br>Not Applicable                                    |
| Other analyses            | 17      | Not Applicable                                                                        |
| <b>Discussion</b>         |         |                                                                                       |
| Key results               | 18      | Lines:220-249                                                                         |
| Limitations               | 19      | Lines 245-249                                                                         |
| Interpretation            | 20      | Lines:251-259                                                                         |
| Generalisability          | 21      | Lines:251-259                                                                         |
| <b>Other information</b>  |         |                                                                                       |
| Funding                   | 22      | Line:286                                                                              |

\*Give information separately for exposed and unexposed groups.

**Note:** An Explanation and Elaboration article discusses each checklist item and gives methodological background and published examples of transparent reporting. The STROBE checklist is best used in conjunction with this article (freely available on the Web sites of PLoS Medicine at <http://www.plosmedicine.org/>, Annals of Internal Medicine at <http://www.annals.org/>, and Epidemiology at <http://www.epidem.com/>). Information on the STROBE Initiative is available at <http://www.strobe-statement.org>.
